# Supplementary material for: Restoring mortality data in the FOURIER cardiovascular outcomes trial of evolocumab in patients with cardiovascular disease: a reanalysis based on regulatory data
Source: PubMed Central journal article supplement — BMJ Open. 2022 Dec 29;12(12):e060172. doi: 10.1136/bmjopen-2021-060172 (PMC9809302; doi:10.1136/bmjopen-2021-060172), 2022-12-29
Supplement: bmjopen-2021-060172supp001.pdf [file bmjopen-2021-060172supp001.pdf]

**Table S1. Summary of RIAT death re-adjudication (FOURIER CSR vs. RIAT project)**

| <b>Adjudicated cause of death (CSR)</b>       | <b>RIAT Re-adjudication</b>                             | <b>EVO*</b> | <b>CSR page(s)</b>                        | <b>PLA*</b> | <b>CSR page(s)</b>                              |
|-----------------------------------------------|---------------------------------------------------------|-------------|-------------------------------------------|-------------|-------------------------------------------------|
| Death - Cardiovascular (Due To An Acute MI)   | Death - Cardiovascular (Due To Heart Failure)           | 3           | 23860; 24127; 24282                       | 1           | 24440                                           |
|                                               | Death - Cardiovascular (Sudden Cardiac)                 | 1           | 23865                                     | 1           | 24256                                           |
|                                               | Death - Non-Cardiovascular (Infection; Includes Sepsis) | 1           | 24365                                     | 2           | 24314; 24497                                    |
|                                               | Death - Non-Cardiovascular (Malignancy)                 | 0           |                                           | 1           | 24247                                           |
|                                               | Death - Non-Cardiovascular (Pulmonary)                  | 1           | 23919                                     | 1           | 23843                                           |
|                                               | Death - Undetermined                                    | 4           | 24061; 24331; 24533; 24595                | 7           | 23874; 23975; 23992; 24081; 24458; 24485; 24622 |
| Death - Cardiovascular (Due To CV Hemorrhage) | Death - Cardiovascular (Due To Stroke)                  | 2           | 24573; 23911                              | 0           |                                                 |
|                                               | Death - Undetermined                                    | 1           | 24070                                     | 0           |                                                 |
| Death - Cardiovascular (Due To CV Procedures) | Death - Cardiovascular (Due To An Acute MI)             | 1           | 24154                                     | 0           |                                                 |
|                                               | Death - Cardiovascular (Due To Other Causes)            | 0           |                                           | 1           | 23982                                           |
|                                               | Death - Undetermined                                    | 1           | 23909                                     | 3           | 23767; 23796; 24104                             |
| Death - Cardiovascular (Due To Heart Failure) | Death - Non-Cardiovascular                              | 1           | 23837                                     | 1           | 23813                                           |
|                                               | Death - Non-Cardiovascular (Infection; Includes Sepsis) | 1           | 24241                                     | 0           |                                                 |
|                                               | Death - Non-Cardiovascular (Pulmonary)                  | 0           |                                           | 2           | 24091; 24677                                    |
|                                               | Death - Undetermined                                    | 10          | 24036; 24159; 24328; 24354; 24356; 24363; | 7           | 23834; 24110; 24229; 24304; 24359; 24631; 24668 |

|                                                                                     |                                                                             |    |                                                                                                                                      |    |                                                                                                 |
|-------------------------------------------------------------------------------------|-----------------------------------------------------------------------------|----|--------------------------------------------------------------------------------------------------------------------------------------|----|-------------------------------------------------------------------------------------------------|
|                                                                                     |                                                                             |    | 24389; 24448; 24608;<br>24644                                                                                                        |    |                                                                                                 |
| Death - Cardiovascular (Due To Other CV Causes)<br>(Chronic Ischemic Heart Disease) | Death - Cardiovascular (Due To Heart Failure)                               | 1  | 24457                                                                                                                                | 0  |                                                                                                 |
| Death - Cardiovascular (Due To Other CV Causes)<br>(Endocarditis)                   | Death - Undetermined                                                        | 1  | 23962                                                                                                                                | 0  |                                                                                                 |
| Death - Cardiovascular (Due To Other CV Causes)<br>(Peripheral Arterial Disease)    | Death - Undetermined                                                        | 1  | 23791                                                                                                                                | 0  |                                                                                                 |
| Death - Cardiovascular (Due To Other CV Causes)<br>(Pulmonary Embolism)             | Death - Undetermined                                                        | 0  |                                                                                                                                      | 2  | 24092; 24436                                                                                    |
| Death - Cardiovascular (Due To Stroke)                                              | Death - Cardiovascular (Due To An Acute MI)                                 | 1  | 24230                                                                                                                                | 0  |                                                                                                 |
|                                                                                     | Death - Cardiovascular (Due To Heart Failure)                               | 1  | 24344                                                                                                                                | 0  |                                                                                                 |
|                                                                                     | Death - Non-Cardiovascular (Infection; Includes Sepsis)                     | 2  | 24101; 24265                                                                                                                         | 2  | 24050; 24454                                                                                    |
|                                                                                     | Death - Undetermined                                                        | 9  | 24055; 24060; 24074;<br>24147; 24362; 24482;<br>24564; 24577; 24647                                                                  | 13 | 23946; 23974; 23997; 24117; 24176; 24379;<br>24483; 24487; 24502; 24568; 24657; 24672;<br>24687 |
| Death - Cardiovascular<br>(Sudden Cardiac)                                          | Death - Cardiovascular (Due To An Acute MI)                                 | 17 | 23778; 23800; 23849;<br>23897; 23939; 24141;<br>24394; 24433; 24437;<br>24447; 24450; 24452;<br>24461; 24493; 24515;<br>24606; 24656 | 9  | 23820; 23892; 24019; 24103; 24507; 24514;<br>24521; 24581; 24599                                |
|                                                                                     | Death - Cardiovascular (Due To Cardiovascular Hemorrhage; aneurysm rupture) | 1  | 24238                                                                                                                                | 0  |                                                                                                 |

|                                                                      |    |                                                                                                                                                                                                                                        |    |                                                                                                                                                                                                                                                                                                                                                                                                                                                                               |
|----------------------------------------------------------------------|----|----------------------------------------------------------------------------------------------------------------------------------------------------------------------------------------------------------------------------------------|----|-------------------------------------------------------------------------------------------------------------------------------------------------------------------------------------------------------------------------------------------------------------------------------------------------------------------------------------------------------------------------------------------------------------------------------------------------------------------------------|
| Death - Cardiovascular (Due To Heart Failure)                        | 10 | 23773;23792; 23887; 23895; 24017; 24199; 24277; 24374; 24474; 24484                                                                                                                                                                    | 4  | 24031; 24320; 24325; 24416                                                                                                                                                                                                                                                                                                                                                                                                                                                    |
| Death - Cardiovascular (Due To Other CV Causes) (Pulmonary Embolism) | 4  | 24035; 24248; 24418; 24532                                                                                                                                                                                                             | 3  | 24000; 24025; 24237                                                                                                                                                                                                                                                                                                                                                                                                                                                           |
| Death - Cardiovascular (Due To Other Causes)                         | 3  | 24340; 24341; 24294                                                                                                                                                                                                                    | 0  |                                                                                                                                                                                                                                                                                                                                                                                                                                                                               |
| Death - Cardiovascular (Due To Stroke)                               | 2  | 24054; 24213                                                                                                                                                                                                                           | 4  | 23857; 23866; 23936; 24066                                                                                                                                                                                                                                                                                                                                                                                                                                                    |
| Death - Non-Cardiovascular                                           | 0  |                                                                                                                                                                                                                                        | 1  | 23842 (also p. 8699 and 8700)                                                                                                                                                                                                                                                                                                                                                                                                                                                 |
| Death - Non-Cardiovascular (Amyotrophic lateral sclerosis) (ALS)     | 1  | 24286                                                                                                                                                                                                                                  | 0  |                                                                                                                                                                                                                                                                                                                                                                                                                                                                               |
| Death - Non-Cardiovascular (Drowning)                                | 1  | 24029                                                                                                                                                                                                                                  | 0  |                                                                                                                                                                                                                                                                                                                                                                                                                                                                               |
| Death - Non-Cardiovascular (Infection; Includes Sepsis)              | 1  | 24227                                                                                                                                                                                                                                  | 0  |                                                                                                                                                                                                                                                                                                                                                                                                                                                                               |
| Death - Non-Cardiovascular (Malignancy)                              | 2  | 24020; 24254                                                                                                                                                                                                                           | 2  | 24321; 24525                                                                                                                                                                                                                                                                                                                                                                                                                                                                  |
| Death - Non-Cardiovascular (Non-Cardiovascular Hemorrhage)           | 1  | 24518                                                                                                                                                                                                                                  | 1  | 24164                                                                                                                                                                                                                                                                                                                                                                                                                                                                         |
| Death - Non-Cardiovascular (Renal)                                   | 1  | 24579                                                                                                                                                                                                                                  | 0  |                                                                                                                                                                                                                                                                                                                                                                                                                                                                               |
| Death - Non-Cardiovascular (Trauma)                                  | 0  |                                                                                                                                                                                                                                        | 1  | 23848                                                                                                                                                                                                                                                                                                                                                                                                                                                                         |
| Death - Undetermined                                                 | 67 | 23769; 23789; 23861; 23901; 23910; 23913; 23918; 23922; 23938; 23942; 23958; 23971; 23986; 24004; 24013; 24041; 24044; 24058; 24105; 24131; 24138; 24144; 24155; 24162; 24173; 24179; 24193; 24218; 24261; 24266; 24268; 24297; 24307; | 79 | 24469; 23770; 23816; 23818; 23836; 23859; 23880; 23881; 23890; 23903; 23923; 23933; 23947; 23953; 23956; 23963; 23978; 23981; 24007; 24016; 24051; 24052; 24057; 24065; 24078; 24088; 24132; 24136; 24143; 24146; 24152; 24180; 24186; 24200; 24201; 24209; 24211; 24219; 24242; 24250; 24255; 24259; 24283; 24324; 24342; 24343; 24348; 24351; 24371; 24376; 24377; 24383; 24384; 24386; 24391; 24399; 24401; 24410; 24426; 24434; 24469; 24471; 24480; 24490; 24494; 24496; |

|                                                                      |                                                                      |   |                                                                                                                                                                                                                                                                               |   |                                                                                                 |
|----------------------------------------------------------------------|----------------------------------------------------------------------|---|-------------------------------------------------------------------------------------------------------------------------------------------------------------------------------------------------------------------------------------------------------------------------------|---|-------------------------------------------------------------------------------------------------|
|                                                                      |                                                                      |   | 24310; 24312; 24319;<br>24323; 24332; 24333;<br>24337; 24380; 24390;<br>24409; 24411; 24419;<br>24444; 24445; 24460;<br>24463; 24465; 24472;<br>24473; 24479; 24495;<br>24510; 24531; 24560;<br>24594; 24619; 24620;<br>24623; 24641; 24655;<br>24667; 24674; 24682;<br>24694 |   | 24537; 24542; 24555; 24602; 24603; 24625;<br>24626; 24649; 24651; 24654; 24664; 24685;<br>24692 |
| Death - Non-Cardiovascular (Hepatobiliary)                           | Death - Cardiovascular (Due To Stroke)                               | 1 | 24026                                                                                                                                                                                                                                                                         | 0 |                                                                                                 |
| Death - Non-Cardiovascular (Infection; Includes Sepsis)              | Death - Cardiovascular (Due To Heart Failure)                        | 0 |                                                                                                                                                                                                                                                                               | 1 | 24693                                                                                           |
|                                                                      | Death - Non-Cardiovascular (Malignancy)                              | 2 | 24468; 24582                                                                                                                                                                                                                                                                  | 0 |                                                                                                 |
|                                                                      | Death - Non-Cardiovascular (Pulmonary)                               | 0 |                                                                                                                                                                                                                                                                               | 1 | 24252                                                                                           |
|                                                                      | Death - Undetermined                                                 | 3 | 24273; 24370; 24453                                                                                                                                                                                                                                                           | 2 | 23802; 24137                                                                                    |
| Death - Non-Cardiovascular (Malignancy)                              | Death - Cardiovascular (Due To Other CV Causes) (Pulmonary Embolism) | 1 | 24063                                                                                                                                                                                                                                                                         | 0 |                                                                                                 |
|                                                                      | Death - Cardiovascular (Sudden Cardiac)                              | 0 |                                                                                                                                                                                                                                                                               | 1 | 24142                                                                                           |
|                                                                      | Death – Non Cardiovascular                                           | 0 |                                                                                                                                                                                                                                                                               | 1 | 24345                                                                                           |
|                                                                      | Death - Non-Cardiovascular (Infection; Includes Sepsis)              | 1 | 24358                                                                                                                                                                                                                                                                         | 1 | 24586                                                                                           |
|                                                                      | Death - Undetermined                                                 | 3 | 23889; 24301; 24397                                                                                                                                                                                                                                                           | 8 | 23795; 23855; 23900; 23998; 24188; 24300;<br>24488; 24675                                       |
| Death - Non-Cardiovascular (Non-Cardiovascular Procedure Or Surgery) | Death - Non-Cardiovascular (Malignancy)                              | 0 |                                                                                                                                                                                                                                                                               | 1 | 23819                                                                                           |

|                                                                  |                                                                         |   |                                   |   |                     |
|------------------------------------------------------------------|-------------------------------------------------------------------------|---|-----------------------------------|---|---------------------|
| Death - Non-Cardiovascular (Other Non-Cardiovascular) (Drowning) | Death - Undetermined                                                    | 0 |                                   | 1 | 24459               |
| Death - Non-Cardiovascular (Pulmonary)                           | Death - Non-Cardiovascular (Infection; Includes Sepsis)                 | 5 | 24129; 24361; 24520; 24545; 24547 | 1 | 24398               |
|                                                                  | Death - Undetermined                                                    | 1 | 24695                             | 1 | 24637               |
| Death - Non-Cardiovascular (Renal)                               | Death - Cardiovascular (Due To Stroke)                                  | 0 |                                   | 1 | 24688               |
|                                                                  | Death - Undetermined                                                    | 1 | 24596                             | 0 |                     |
| Death - Non-Cardiovascular (Suicide)                             | Death - Undetermined                                                    | 1 | 24275                             | 0 |                     |
| Death - Non-Cardiovascular (Trauma)                              | Death - Cardiovascular (Due To An Acute MI)                             | 1 | 23825                             | 0 |                     |
|                                                                  | Death - Cardiovascular (Due To Stroke)                                  | 0 |                                   | 1 | 24703               |
|                                                                  | Death - Non-Cardiovascular (Due To Poisoning)                           | 1 | 24299                             | 0 |                     |
|                                                                  | Death - Undetermined                                                    | 2 | 23980; 24306                      | 3 | 23790; 24562; 24669 |
| Death - Undetermined                                             | Death - Cardiovascular (Due To An Acute MI)                             | 1 | 24291                             | 1 | 24197               |
|                                                                  | Death - Cardiovascular (Due To Heart Failure)                           | 1 | 24183                             | 1 | 24476               |
|                                                                  | Death - Cardiovascular (Due To Stroke)                                  | 0 |                                   | 1 | 24205               |
|                                                                  | Death - Cardiovascular (Sudden Cardiac)                                 | 1 | 24243                             | 2 | 23852; 24038        |
|                                                                  | Death - Non-Cardiovascular (Malignancy)                                 | 0 |                                   | 1 | 24189               |
|                                                                  | Death - Non-Cardiovascular (Non-Cardiovascular Hemorrhage; GI bleeding) | 1 | 24395                             | 0 |                     |

|                        |                                                            |     |       |     |  |
|------------------------|------------------------------------------------------------|-----|-------|-----|--|
|                        | Death - Non-Cardiovascular<br>(Poisoning; opioid overdose) | 1   | 24673 | 0   |  |
| total re-adjudications |                                                            | 182 |       | 178 |  |
| total deaths           | 870                                                        |     |       |     |  |
| % re-adjudications     | 41,38%                                                     |     |       |     |  |

\* EVO: evolocumab group; PLA: placebo group
