# Supplementary material for: Restoring mortality data in the FOURIER cardiovascular outcomes trial of evolocumab in patients with cardiovascular disease: a reanalysis based on regulatory data
Source: PubMed Central journal article supplement — BMJ Open. 2022 Dec 29;12(12):e060172. doi: 10.1136/bmjopen-2021-060172 (PMC9809302; doi:10.1136/bmjopen-2021-060172), 2022-12-29
Supplement: bmjopen-2021-060172supp002.pdf [file bmjopen-2021-060172supp002.pdf]

**Table S2. Deaths: detailed explanation of individual re-adjudication decisions by RIAT re-adjudication committee**

**Definitions**

*Reported term:* local clinical investigator's original diagnosis as reported to the FOURIER Clinical Events Committee

*Coded term:* local clinical investigator's original diagnosis according to pre-defined diagnosis options

*Adjudication:* cause of death adjudicated by the Fourier Clinical Events Committee (Cardiovascular; Non-cardiovascular; Undetermined)

*Adjudicated cause of death:* cause of death adjudicated by the Fourier Clinical Events Committee (specific diagnosis)

**Summary of re-adjudications**

| Case | Page  | Group | FOURIER clinical investigator death reports and clinical-events committee adjudications                                                                                  | RIAT re-adjudication committee comments                                                                            | RIAT initial re-adjudication                                       | RIAT final re-adjudication |
|------|-------|-------|--------------------------------------------------------------------------------------------------------------------------------------------------------------------------|--------------------------------------------------------------------------------------------------------------------|--------------------------------------------------------------------|----------------------------|
| #2   | 23767 | PLA   | Reported term: Death<br>Coded term: Death<br>Adjudication: Cardiovascular Death<br>Adjudicated cause of death: Death - Cardiovascular (Due To Cardiovascular Procedures) | The narrative contained no evidence to support the FOURIER Clinical Events Committee’s adjudicated cause of death. | <i>Death Undetermined</i><br><br>Additional information requested. | <i>Death Undetermined</i>  |
| #4   | 23769 | EVO   | Reported term: Death<br>Coded term: Death<br>Adjudication: Cardiovascular Death<br>Adjudicated cause of death: Death - Cardiovascular (Sudden Cardiac)                   | The narrative contained no evidence to support the FOURIER Clinical Events Committee’s adjudicated cause of death. | <i>Death Undetermined</i><br><br>Additional information requested. | <i>Death Undetermined</i>  |
| #5   | 23770 | PLA   | Reported term: Death<br>Coded term: Death<br>Adjudication: Cardiovascular Death                                                                                          | The narrative contained no evidence to support the FOURIER Clinical Events                                         | <i>Death Undetermined</i>                                          | <i>Death Undetermined</i>  |

|     |       |     | Adjudicated cause of death: Death - Cardiovascular (Sudden Cardiac)                                                                                                                                | Committee's adjudicated cause of death.                                                                                                                                                                       | Additional information requested.                                  |                                                      |
|-----|-------|-----|----------------------------------------------------------------------------------------------------------------------------------------------------------------------------------------------------|---------------------------------------------------------------------------------------------------------------------------------------------------------------------------------------------------------------|--------------------------------------------------------------------|------------------------------------------------------|
| #8  | 23773 | EVO | Reported term: Acute heart failure<br>Coded term: Cardiac failure acute<br>Adjudication: Cardiovascular Death<br>Adjudicated cause of death: Death - Cardiovascular (Sudden Cardiac)               | The narratives read <i>the subject experienced cardiac failure acute [acute heart failure]</i> and died on the same day.                                                                                      |                                                                    | <i>Death - Cardiovascular (Due To Heart Failure)</i> |
| #13 | 23778 | EVO | Reported term: Acute myocardial infarction<br>Coded term: Acute myocardial infarction<br>Adjudication: Cardiovascular Death<br>Adjudicated cause of death: Death - Cardiovascular (Sudden Cardiac) | The narratives read <i>the subject experienced acute myocardial infarction</i> and died on the same day.                                                                                                      |                                                                    | <i>Death - Cardiovascular (Due To An Acute MI)</i>   |
| #24 | 23789 | EVO | Reported term: Death<br>Coded term: Death<br>Adjudication: Undetermined Death<br>Adjudicated cause of death: Death - Cardiovascular (Sudden Cardiac)                                               | The narrative contained no evidence to support the FOURIER Clinical Events Committee's adjudicated cause of death.                                                                                            | <i>Death Undetermined</i><br><br>Additional information requested. | <i>Death Undetermined</i>                            |
| #25 | 23790 | PLA | Reported term: Death<br>Coded term: Death<br>Adjudication: Non-Cardiovascular Death<br>Adjudicated cause of death: Death - Non-Cardiovascular (Trauma)                                             | The narrative contained no evidence to support the FOURIER Clinical Events Committee's adjudicated cause of death.                                                                                            | <i>Death Undetermined</i><br><br>Additional information requested. | <i>Death Undetermined</i>                            |
| #26 | 23791 | EVO | Reported term: Death<br>Coded term: Death<br>Adjudication: Undetermined Death<br>Adjudicated cause of death: Death - Cardiovascular (Due To Other Cardiovascular Causes) (PAD)                     | The narrative contained no evidence to support the FOURIER Clinical Events Committee's adjudicated cause of death. The patient had peripheral arterial occlusive disease on day 1 that was resolved on day 42 | <i>Death Undetermined</i><br><br>Additional information requested. | <i>Death Undetermined</i>                            |

|     |       |     |                                                                                                                                                                              |                                                                                                                                                   |                                                                    |                                                      |
|-----|-------|-----|------------------------------------------------------------------------------------------------------------------------------------------------------------------------------|---------------------------------------------------------------------------------------------------------------------------------------------------|--------------------------------------------------------------------|------------------------------------------------------|
|     |       |     |                                                                                                                                                                              | (CSR page 8046). Died on day 302.                                                                                                                 |                                                                    |                                                      |
| #27 | 23792 | EVO | Reported term: Brain injury<br>Coded term: Hypoxic brain damage<br>Adjudication: Cardiovascular Death<br>Adjudicated cause of death: Death - Cardiovascular (Sudden Cardiac) | The narratives read <i>the patient was admitted for cardiac failure chronic [chronic heart failure] and died with an outcome of not resolved.</i> |                                                                    | <i>Death - Cardiovascular (Due To Heart Failure)</i> |
| #29 | 23795 | PLA | Reported term: Death<br>Coded term: Death<br>Adjudication: Non-Cardiovascular Death<br>Adjudicated cause of death: Death - Non-Cardiovascular (Malignancy)                   | The narrative contained no evidence to support the FOURIER Clinical Events Committee's adjudicated cause of death.                                | <i>Death Undetermined</i><br><br>Additional information requested. | <i>Death Undetermined</i>                            |
| #30 | 23796 | PLA | Reported term: Death<br>Coded term: Death<br>Adjudication: Cardiovascular Death<br>Adjudicated cause of death: Death - Cardiovascular (Due To Cardiovascular Procedures)     | The narrative contained no evidence to support the FOURIER Clinical Events Committee's adjudicated cause of death.                                | <i>Death Undetermined</i><br><br>Additional information requested. | <i>Death Undetermined</i>                            |
| #33 | 23800 | EVO | Reported term: Death<br>Coded term: Death<br>Adjudication: Cardiovascular Death<br>Adjudicated cause of death: Death - Cardiovascular (Sudden Cardiac)                       | The narratives read that the <i>subject was reported with myocardial infarction (Grade 4) and died.</i>                                           |                                                                    | <i>Death - Cardiovascular (Due To An Acute MI)</i>   |
| #35 | 23802 | PLA | Reported term: Death<br>Coded term: Death<br>Adjudication: Non-Cardiovascular Death<br>Adjudicated cause of death: Death - Non-Cardiovascular (Infection; Includes Sepsis)   | The narrative contained no evidence to support the FOURIER Clinical Events Committee's adjudicated cause of death.                                | <i>Death Undetermined</i><br><br>Additional information requested. | <i>Death Undetermined</i>                            |

|     |       |     |                                                                                                                                                                                                             |                                                                                                                                                                                                                                                        |                                                                    |                                                    |
|-----|-------|-----|-------------------------------------------------------------------------------------------------------------------------------------------------------------------------------------------------------------|--------------------------------------------------------------------------------------------------------------------------------------------------------------------------------------------------------------------------------------------------------|--------------------------------------------------------------------|----------------------------------------------------|
| #44 | 23813 | PLA | Reported term: Multiple organ failure<br>Coded term: Multiple organ dysfunction syndrome<br>Adjudication: Cardiovascular Death<br>Adjudicated cause of death: Death - Cardiovascular (Due To Heart Failure) | The narratives read the patient was admitted for pneumonia and died during admission                                                                                                                                                                   |                                                                    | <i>Death - Non-Cardiovascular</i>                  |
| #46 | 23816 | PLA | Reported term: Death<br>Coded term: Death<br>Adjudication: Cardiovascular Death<br>Adjudicated cause of death: Death - Cardiovascular (Sudden Cardiac)                                                      | In the narratives, there is no evidence to support the adjudicated cause of death.                                                                                                                                                                     | <i>Death Undetermined</i><br><br>Additional information requested. | <i>Death Undetermined</i>                          |
| #47 | 23818 | PLA | Reported term: Death unknown cause<br>Coded term: Death<br>Adjudication: Undetermined Death<br>Adjudicated cause of death: Death - Cardiovascular (Sudden Cardiac)                                          | The narratives read that <i>the subject experienced death [death unknown cause]</i> .                                                                                                                                                                  |                                                                    | <i>Death Undetermined</i>                          |
| #48 | 23819 | PLA | Reported term: Death<br>Coded term: Death<br>Adjudication: Non-Cardiovascular Death<br>Adjudicated cause of death: Death - Non-Cardiovascular (Non-Cardiovascular Procedure Or Surgery)                     | The narratives read “on Day 271 the subject experienced <i>intraductal papillary-mucinous carcinoma of pancreas [pancreatic intraductal mucinous neoplasm] (Grade 3)</i> . The event ended on Day 388 with an outcome of resolved” (died on that day). |                                                                    | <i>Death - Non-Cardiovascular (Malignancy)</i>     |
| #49 | 23820 | PLA | Reported term: Acute myocardial infarction<br>Coded term: Acute myocardial infarction<br>Adjudication: Cardiovascular Death<br>Adjudicated cause of death: Death - Cardiovascular (Sudden Cardiac)          | The narratives read <i>the subject experienced acute myocardial infarction</i> and died on the same day.                                                                                                                                               |                                                                    | <i>Death - Cardiovascular (Due To An Acute MI)</i> |

|     |       |     |                                                                                                                                                                                                              |                                                                                                                                                                                                         |                                                                    |                                                    |
|-----|-------|-----|--------------------------------------------------------------------------------------------------------------------------------------------------------------------------------------------------------------|---------------------------------------------------------------------------------------------------------------------------------------------------------------------------------------------------------|--------------------------------------------------------------------|----------------------------------------------------|
| #54 | 23825 | EVO | Reported term: Cardiogenic shock<br>Coded term: Cardiogenic shock<br>Adjudication: Cardiovascular Death<br>Adjudicated cause of death: Death - Non-Cardiovascular (Trauma)                                   | The narratives read that on <i>Day 267 the subject was reported with myocardial infarction (Grade 4) and on (Day 267) the subject experienced cardiogenic shock (Grade 4) with an outcome of fatal.</i> |                                                                    | <i>Death - Cardiovascular (Due To An Acute MI)</i> |
| #63 | 23834 | PLA | Reported term: Death<br>Coded term: Death<br>Adjudication: Cardiovascular Death<br>Adjudicated cause of death: Death - Cardiovascular (Due To Heart Failure)                                                 | The narrative contained no evidence to support the FOURIER Clinical Events Committee's adjudicated cause of death.                                                                                      | <i>Death Undetermined</i><br><br>Additional information requested. | <i>Death Undetermined</i>                          |
| #65 | 23836 | PLA | Reported term: Death<br>Coded term: Death<br>Adjudication: Cardiovascular Death<br>Adjudicated cause of death: Death - Cardiovascular (Sudden Cardiac)                                                       | The narrative contained no evidence to support the FOURIER Clinical Events Committee's adjudicated cause of death.                                                                                      | <i>Death Undetermined</i><br><br>Additional information requested. | <i>Death Undetermined</i>                          |
| #66 | 23837 | EVO | Reported term: Pulseless electrical activity<br>Coded term: Pulseless electrical activity<br>Adjudication: Cardiovascular Death<br>Adjudicated cause of death: Death - Cardiovascular (Due To Heart Failure) | <i>On Day 456 the subject experienced nephropathy toxic [contrast induce nephropathy] and died on the same day.</i>                                                                                     |                                                                    | <i>Death - Non-Cardiovascular</i>                  |
| #70 | 23842 | PLA | Reported term: Arrhythmia<br>Coded term: Sudden death/Arrhythmia<br>Adjudication: Cardiovascular Death<br>Adjudicated cause of death: Death - Cardiovascular (Sudden Cardiac)                                | <i>On Day 802 the subject experienced hip fracture [right hip fracture] (CSR page 8699) and also pneumonia on Day 811 (CSR page 8700). Died on day 812.</i>                                             |                                                                    | <i>Death - Non-Cardiovascular</i>                  |
| #71 | 23843 | PLA | Reported term: Respiratory failure                                                                                                                                                                           | <i>On Day 582 the subject experienced respiratory</i>                                                                                                                                                   |                                                                    | <i>Death - Non-Cardiovascular (Pulmonary)</i>      |

|     |       |     |                                                                                                                                                                                        |                                                                                                                                                                  |                                                                |                                                    |
|-----|-------|-----|----------------------------------------------------------------------------------------------------------------------------------------------------------------------------------------|------------------------------------------------------------------------------------------------------------------------------------------------------------------|----------------------------------------------------------------|----------------------------------------------------|
|     |       |     | Coded term: Hypoxemic respiratory insufficiency<br>Adjudication: Cardiovascular Death<br>Adjudicated cause of death: Death - Cardiovascular (Due To An Acute MI)                       | <i>failure [hypoxemic respiratory insufficiency] and died.</i>                                                                                                   |                                                                |                                                    |
| #75 | 23848 | PLA | Reported term: Road traffic accident<br>Coded term: Road traffic accident<br>Adjudication: Cardiovascular Death<br>Adjudicated cause of death: Death - Cardiovascular (Sudden Cardiac) | On Day 588 <i>the subject experienced road traffic accident</i> and died.                                                                                        |                                                                | <i>Death - Non-Cardiovascular (Trauma)</i>         |
| #76 | 23849 | EVO | Reported term: Death<br>Coded term: Death<br>Adjudication: Cardiovascular Death<br>Adjudicated cause of death: Death - Cardiovascular (Sudden Cardiac)                                 | On Day 341 <i>the subject was reported with acute myocardial infarction [myocardial infarction acute] (Grade 4) and (Day 341) the subject experienced death.</i> |                                                                | <i>Death - Cardiovascular (Due To An Acute MI)</i> |
| #79 | 23852 | PLA | Reported term: Cardiovascular disorder<br>Coded term: Death-cardiovascular<br>Adjudication: Cardiovascular Death<br>Adjudicated cause of death: Death – Undetermined                   | On Day 614 <i>the subject experienced cardiovascular disorder [death-cardiovascular] with an outcome of fatal.</i>                                               |                                                                | Death - Cardiovascular (Sudden Cardiac)            |
| #82 | 23855 | PLA | Reported term: Death<br>Coded term: Death<br>Adjudication: Undetermined Death<br>Adjudicated cause of death: Death - Non-Cardiovascular (Malignancy)                                   | The narrative contained no evidence to support the FOURIER Clinical Events Committee’s adjudicated cause of death.                                               | <i>Death Undetermined</i><br>Additional information requested. | <i>Death Undetermined</i>                          |
| #84 | 23857 | PLA | Reported term: Sudden cardiac death<br>Coded term: Sudden cardiac death<br>Adjudication: Cardiovascular Death<br>Adjudicated cause of death: Death - Cardiovascular (Sudden Cardiac)   | On Day 198 <i>the subject experienced cerebrovascular accident [stroke] (CSR page 8903) and died on day 225.</i>                                                 |                                                                | <i>Death - Cardiovascular (Due To Stroke)</i>      |

|      |       |     |                                                                                                                                                                                                  |                                                                                                                                                                                    |                                                                    |                                                      |
|------|-------|-----|--------------------------------------------------------------------------------------------------------------------------------------------------------------------------------------------------|------------------------------------------------------------------------------------------------------------------------------------------------------------------------------------|--------------------------------------------------------------------|------------------------------------------------------|
| #86  | 23859 | PLA | Reported term: Death<br>Coded term: Death<br>Adjudication: Undetermined Death<br>Adjudicated cause of death: Death - Cardiovascular (Sudden Cardiac)                                             | The narrative contained no evidence to support the FOURIER Clinical Events Committee's adjudicated cause of death.                                                                 | <i>Death Undetermined</i><br><br>Additional information requested. | <i>Death Undetermined</i>                            |
| #87  | 23860 | EVO | Reported term: Death<br>Coded term: Death<br>Adjudication: Cardiovascular Death<br>Adjudicated cause of death: Death - Cardiovascular (Due To An Acute MI)                                       | On Day 409 <i>the subject experienced heart failure (Grade 4) and died.</i>                                                                                                        |                                                                    | <i>Death - Cardiovascular (Due To Heart Failure)</i> |
| #88  | 23861 | EVO | Reported term: Death<br>Coded term: Death<br>Adjudication: Undetermined Death<br>Adjudicated cause of death: Death - Cardiovascular (Sudden Cardiac)                                             | The narrative contained no evidence to support the FOURIER Clinical Events Committee's adjudicated cause of death.                                                                 | <i>Death Undetermined</i><br><br>Additional information requested. | <i>Death Undetermined</i>                            |
| #92  | 23865 | EVO | Reported term: Sudden cardiac death<br>Coded term: Sudden cardiac death<br>Adjudication: Cardiovascular Death<br>Adjudicated cause of death: Death - Cardiovascular (Due To An Acute MI)         | On Day 482 <i>the subject experienced sudden cardiac death.</i> The narrative contained no evidence to support the FOURIER Clinical Events Committee's adjudicated cause of death. |                                                                    | <i>Death - Cardiovascular (Sudden Cardiac)</i>       |
| #93  | 23866 | PLA | Reported term: Cerebrovascular accident<br>Coded term: Cerebrovascular accident<br>Adjudication: Non-Cardiovascular Death<br>Adjudicated cause of death: Death - Cardiovascular (Sudden Cardiac) | On Day 136 <i>the subject experienced cerebrovascular accident (Grade 4) with an outcome of fatal.</i>                                                                             |                                                                    | <i>Death - Cardiovascular (Due To Stroke)</i>        |
| #100 | 23874 | PLA | Reported term: Sudden death<br>Coded term: Sudden death<br>Adjudication: Cardiovascular Death                                                                                                    | On Day 1146 <i>the subject experienced sudden death [death sudden] (Grade 4).</i> The narrative contained no                                                                       | <i>Death Undetermined</i><br><br>Additional information requested. | <i>Death Undetermined</i>                            |

|      |       |     |                                                                                                                                                                                     |                                                                                                                    |                                                                |                                                      |
|------|-------|-----|-------------------------------------------------------------------------------------------------------------------------------------------------------------------------------------|--------------------------------------------------------------------------------------------------------------------|----------------------------------------------------------------|------------------------------------------------------|
|      |       |     | Adjudicated cause of death: Death - Cardiovascular (Due To An Acute MI)                                                                                                             | evidence to support the FOURIER Clinical Events Committee's adjudicated cause of death.                            |                                                                |                                                      |
| #106 | 23880 | PLA | Reported term: Sudden death<br>Coded term: Sudden death, cause unknown<br>Adjudication: Cardiovascular Death<br>Adjudicated cause of death: Death - Cardiovascular (Sudden Cardiac) | The narratives read that <i>on Day 522 the subject experienced sudden death [sudden death, cause unknown].</i>     |                                                                | <i>Death Undetermined</i>                            |
| #107 | 23881 | PLA | Reported term: Sudden death<br>Coded term: Sudden death unexplained<br>Adjudication: Undetermined Death<br>Adjudicated cause of death: Death - Cardiovascular (Sudden Cardiac)      | The narratives read that <i>on Day 365 the subject experienced sudden death [sudden death unexplained].</i>        |                                                                | <i>Death Undetermined</i>                            |
| #112 | 23887 | EVO | Reported term: Death<br>Coded term: Death<br>Adjudication: Cardiovascular Death<br>Adjudicated cause of death: Death - Cardiovascular (Sudden Cardiac)                              | The narratives read that <i>on Day 372 the subject experienced cardiac failure [heart failure (NOS)] and died.</i> |                                                                | <i>Death - Cardiovascular (Due To Heart Failure)</i> |
| #114 | 23889 | EVO | Reported term: Death<br>Coded term: Death<br>Adjudication: Undetermined Death<br>Adjudicated cause of death: Death - Non-Cardiovascular (Malignancy)                                | The narrative contained no evidence to support the FOURIER Clinical Events Committee's adjudicated cause of death. | <i>Death Undetermined</i><br>Additional information requested. | <i>Death Undetermined</i>                            |
| #115 | 23890 | PLA | Reported term: Death<br>Coded term: Death<br>Adjudication: Cardiovascular Death<br>Adjudicated cause of death: Death - Cardiovascular (Sudden Cardiac)                              | The narrative contained no evidence to support the FOURIER Clinical Events Committee's adjudicated cause of death. | <i>Death Undetermined</i><br>Additional information requested. | <i>Death Undetermined</i>                            |
| #117 | 23892 | PLA | Reported term: Acute myocardial infarction                                                                                                                                          | The narratives read that <i>on Day 174 the subject</i>                                                             |                                                                | <i>Death - Cardiovascular (Due To An Acute MI)</i>   |



|      |       |     |                                                                                                                                                                          |                                                                                                                                                                    |                                                                    |                                                      |
|------|-------|-----|--------------------------------------------------------------------------------------------------------------------------------------------------------------------------|--------------------------------------------------------------------------------------------------------------------------------------------------------------------|--------------------------------------------------------------------|------------------------------------------------------|
|      |       |     | Coded term: Acute myocardial infarction<br>Adjudication: Cardiovascular Death<br>Adjudicated cause of death: Death - Cardiovascular (Sudden Cardiac)                     | <i>experienced acute myocardial infarction (Grade 4) with an outcome of fatal.</i>                                                                                 |                                                                    |                                                      |
| #120 | 23895 | EVO | Reported term: Cardiac failure<br>Coded term: Heart failure<br>Adjudication: Cardiovascular Death<br>Adjudicated cause of death: Death - Cardiovascular (Sudden Cardiac) | The narratives read that on <i>Day 69 the subject experienced cardiac failure [heart failure] (Grade 4) with an outcome of fatal.</i>                              |                                                                    | <i>Death - Cardiovascular (Due To Heart Failure)</i> |
| #122 | 23897 | EVO | Reported term: Death<br>Coded term: Death<br>Adjudication: Cardiovascular Death<br>Adjudicated cause of death: Death - Cardiovascular (Sudden Cardiac)                   | The narratives read that <i>on Day 259 the subject was reported with myocardial infarction (Grade 4) and on (Day 259) the subject experienced death (Grade 4).</i> |                                                                    | <i>Death - Cardiovascular (Due To An Acute MI)</i>   |
| #125 | 23900 | PLA | Reported term: Death<br>Coded term: Death<br>Adjudication: Non-Cardiovascular Death<br>Adjudicated cause of death: Death - Non-Cardiovascular (Malignancy)               | The narrative contained no evidence to support the FOURIER Clinical Events Committee's adjudicated cause of death.                                                 | <i>Death Undetermined</i><br><br>Additional information requested. | <i>Death Undetermined</i>                            |
| #126 | 23901 | EVO | Reported term: Sudden death<br>Coded term: Sudden death<br>Adjudication: Cardiovascular Death<br>Adjudicated cause of death: Death - Cardiovascular (Sudden Cardiac)     | The narrative contained no evidence to support the FOURIER Clinical Events Committee's adjudicated cause of death.                                                 | <i>Death Undetermined</i><br><br>Additional information requested. | <i>Death Undetermined</i>                            |
| #128 | 23903 | PLA | Reported term: Death<br>Coded term: Unknown cause of death<br>Adjudication: Undetermined Death<br>Adjudicated cause of death: Death - Cardiovascular (Sudden Cardiac).   | The narratives read that <i>on Day 1019 the subject experienced death [unknown cause of death].</i>                                                                |                                                                    | <i>Death Undetermined</i>                            |

|      |       |     |                                                                                                                                                                                                                |                                                                                                                    |                                                                    |                                                                    |
|------|-------|-----|----------------------------------------------------------------------------------------------------------------------------------------------------------------------------------------------------------------|--------------------------------------------------------------------------------------------------------------------|--------------------------------------------------------------------|--------------------------------------------------------------------|
| #134 | 23909 | EVO | Reported term: Cardiac death<br>Coded term: Cardiac death<br>Adjudication: Cardiovascular Death<br>Adjudicated cause of death: Death - Cardiovascular (Due To Cardiovascular Procedures)                       | The narrative contained no evidence to support the FOURIER Clinical Events Committee's adjudicated cause of death. | <i>Death Undetermined</i><br><br>Additional information requested. | <i>Death Undetermined</i>                                          |
| #135 | 23910 | EVO | Reported term: Death<br>Coded term: Death<br>Adjudication: Cardiovascular Death<br>Adjudicated cause of death: Death - Cardiovascular (Sudden Cardiac)                                                         | The narrative contained no evidence to support the FOURIER Clinical Events Committee's adjudicated cause of death. | <i>Death Undetermined</i><br><br>Additional information requested. | <i>Death Undetermined</i>                                          |
| #136 | 23911 | EVO | Reported term: Intracranial haematoma<br>Coded term: Intracranial haematoma<br>Adjudication: Non-Cardiovascular Death<br>Adjudicated cause of death: Death - Cardiovascular (Due To Cardiovascular Hemorrhage) | The narratives read that <i>on Day 510 the subject experienced intracranial haematoma (Grade 4).</i>               |                                                                    | <i>Death - Cardiovascular (Due To Stroke) (Hemorrhagic stroke)</i> |
| #137 | 23913 | EVO | Reported term: Sudden death<br>Coded term: Sudden death<br>Adjudication: Cardiovascular Death<br>Adjudicated cause of death: Death - Cardiovascular (Sudden Cardiac)                                           | The narrative contained no evidence to support the FOURIER Clinical Events Committee's adjudicated cause of death. | <i>Death Undetermined</i><br><br>Additional information requested. | <i>Death Undetermined</i>                                          |
| #141 | 23918 | EVO | Reported term: Sudden death<br>Coded term: Sudden death, cause unknown<br>Adjudication: Undetermined Death<br>Adjudicated cause of death: Death - Cardiovascular (Sudden Cardiac)                              | The narratives read that <i>on Day 312 the subject experienced sudden death [sudden death, cause unknown].</i>     |                                                                    | <i>Death Undetermined</i>                                          |
| #142 | 23919 | EVO | Reported term: Acute respiratory distress syndrome                                                                                                                                                             | The narratives read that <i>on Day 426 the subject experienced acute respiratory distress</i>                      |                                                                    | <i>Death - Non-Cardiovascular (Pulmonary)</i>                      |

|      |       |     |                                                                                                                                                                             |                                                                                                                         |                                                                    |                                               |
|------|-------|-----|-----------------------------------------------------------------------------------------------------------------------------------------------------------------------------|-------------------------------------------------------------------------------------------------------------------------|--------------------------------------------------------------------|-----------------------------------------------|
|      |       |     | Coded term: Acute respiratory distress syndrome<br>Adjudication: Non-Cardiovascular Death<br>Adjudicated cause of death: Death - Cardiovascular (Due To An Acute MI)        | <i>syndrome (Grade 4) with an outcome of fatal</i>                                                                      |                                                                    |                                               |
| #145 | 23922 | EVO | Reported term: Sudden death<br>Coded term: Sudden death<br>Adjudication: Undetermined Death<br>Adjudicated cause of death: Death - Cardiovascular (Sudden Cardiac)          | The narrative contained no evidence to support the FOURIER Clinical Events Committee's adjudicated cause of death.      | <i>Death Undetermined</i><br><br>Additional information requested. | <i>Death Undetermined</i>                     |
| #146 | 23923 | PLA | Reported term: Sudden death<br>Coded term: Sudden, cause unknown<br>Adjudication: Undetermined Death<br>Adjudicated cause of death: Death - Cardiovascular (Sudden Cardiac) | The narratives read that <i>on Day 93 the subject experienced sudden death [sudden death, cause unknown] (Grade 4).</i> |                                                                    | <i>Death Undetermined</i>                     |
| #154 | 23933 | PLA | Reported term: Death<br>Coded term: Death<br>Adjudication: Cardiovascular Death<br>Adjudicated cause of death: Death - Cardiovascular (Sudden Cardiac)                      | The narrative contained no evidence to support the FOURIER Clinical Events Committee's adjudicated cause of death.      | <i>Death Undetermined</i><br><br>Additional information requested. | <i>Death Undetermined</i>                     |
| #157 | 23936 | PLA | Reported term: Death<br>Coded term: Death on arrival<br>Adjudication: Cardiovascular Death<br>Adjudicated cause of death: Death - Cardiovascular (Sudden Cardiac)           | The narratives read <i>on Day 825 the subject experienced cerebrovascular accident [stroke] (Grade 4) and died.</i>     |                                                                    | <i>Death - Cardiovascular (Due To Stroke)</i> |
| #159 | 23938 | EVO | Reported term: Death<br>Coded term: Death from natural causes<br>Adjudication: Undetermined Death<br>Adjudicated cause of death: Death - Cardiovascular (Sudden Cardiac)    | The narrative contained no evidence to support the FOURIER Clinical Events Committee's adjudicated cause of death.      |                                                                    | <i>Death Undetermined</i>                     |

|      |       |     |                                                                                                                                                                            |                                                                                                                                                                                                           |                                                                    |                                                    |
|------|-------|-----|----------------------------------------------------------------------------------------------------------------------------------------------------------------------------|-----------------------------------------------------------------------------------------------------------------------------------------------------------------------------------------------------------|--------------------------------------------------------------------|----------------------------------------------------|
| #160 | 23939 | EVO | Reported term: Death<br>Coded term: Death from natural causes<br>Adjudication: Cardiovascular Death<br>Adjudicated cause of death: Death - Cardiovascular (Sudden Cardiac) | The narratives read <i>on Day 724 the subject was reported with myocardial infarction [myocardial infarction] (Grade 4) and on Day 724 the subject experienced death [death natural cause] (Grade 4).</i> |                                                                    | <i>Death - Cardiovascular (Due To An Acute MI)</i> |
| #163 | 23942 | EVO | Reported term: Death<br>Coded term: Death<br>Adjudication: Cardiovascular Death<br>Adjudicated cause of death: Death - Cardiovascular (Sudden Cardiac)                     | The narrative contained no evidence to support the FOURIER Clinical Events Committee's adjudicated cause of death.                                                                                        | <i>Death Undetermined</i><br><br>Additional information requested. | <i>Death Undetermined</i>                          |
| #167 | 23946 | PLA | Reported term: Death<br>Coded term: Death<br>Adjudication: Non-Cardiovascular Death<br>Adjudicated cause of death: Death - Cardiovascular (Due To Stroke)                  | The narrative contained no evidence to support the FOURIER Clinical Events Committee's adjudicated cause of death.                                                                                        | <i>Death Undetermined</i><br><br>Additional information requested. | <i>Death Undetermined</i>                          |
| #168 | 23947 | PLA | Reported term: Sudden death<br>Coded term: Sudden death<br>Adjudication: Cardiovascular Death<br>Adjudicated cause of death: Death - Cardiovascular (Sudden Cardiac)       | The narrative contained no evidence to support the FOURIER Clinical Events Committee's adjudicated cause of death.                                                                                        | <i>Death Undetermined</i><br><br>Additional information requested. | <i>Death Undetermined</i>                          |
| #174 | 23953 | PLA | Reported term: Sudden death<br>Coded term: Sudden death<br>Adjudication: Cardiovascular Death<br>Adjudicated cause of death: Death - Cardiovascular (Sudden Cardiac)       | The narrative contained no evidence to support the FOURIER Clinical Events Committee's adjudicated cause of death.                                                                                        | <i>Death Undetermined</i><br><br>Additional information requested. | <i>Death Undetermined</i>                          |
| #177 | 23956 | PLA | Reported term: Death<br>Coded term: Death<br>Adjudication: Cardiovascular Death                                                                                            | The narrative contained no evidence to support the FOURIER Clinical Events                                                                                                                                | <i>Death Undetermined</i>                                          | <i>Death Undetermined</i>                          |

|      |       |     |                                                                                                                                                                                           |                                                                                                                    |                                                                    |                           |
|------|-------|-----|-------------------------------------------------------------------------------------------------------------------------------------------------------------------------------------------|--------------------------------------------------------------------------------------------------------------------|--------------------------------------------------------------------|---------------------------|
|      |       |     | Adjudicated cause of death: Death - Cardiovascular (Sudden Cardiac)                                                                                                                       | Committee's adjudicated cause of death.                                                                            | Additional information requested.                                  |                           |
| #179 | 23958 | EVO | Reported term: Death<br>Coded term: Unknown cause of death<br>Adjudication: Undetermined Death<br>Adjudicated cause of death: Death - Cardiovascular (Sudden Cardiac)                     | The narrative contained no evidence to support the FOURIER Clinical Events Committee's adjudicated cause of death. | <i>Death Undetermined</i><br><br>Additional information requested. | <i>Death Undetermined</i> |
| #183 | 23962 | EVO | Reported term: Death<br>Coded term: Death<br>Adjudication: Cardiovascular Death<br>Adjudicated cause of death: Death - Cardiovascular (Due To Other Cardiovascular Causes) (Endocarditis) | The narrative contained no evidence to support the FOURIER Clinical Events Committee's adjudicated cause of death. | <i>Death Undetermined</i><br><br>Additional information requested. | <i>Death Undetermined</i> |
| #184 | 23963 | PLA | Reported term: Death<br>Coded term: Death<br>Adjudication: Undetermined Death<br>Adjudicated cause of death: Death - Cardiovascular (Sudden Cardiac)                                      | The narrative contained no evidence to support the FOURIER Clinical Events Committee's adjudicated cause of death. | <i>Death Undetermined</i><br><br>Additional information requested. | <i>Death Undetermined</i> |
| #191 | 23971 | EVO | Reported term: Sudden death<br>Coded term: Sudden death of unknown cause<br>Adjudication: Undetermined Death<br>Adjudicated cause of death: Death - Cardiovascular (Sudden Cardiac)       | The narrative contained no evidence to support the FOURIER Clinical Events Committee's adjudicated cause of death. | <i>Death Undetermined</i><br><br>Additional information requested. | <i>Death Undetermined</i> |
| #194 | 23974 | PLA | Reported term: Death<br>Coded term: Death<br>Adjudication: Non-Cardiovascular Death<br>Adjudicated cause of death: Death - Cardiovascular (Due To Stroke)                                 | The narrative contained no evidence to support the FOURIER Clinical Events Committee's adjudicated cause of death. | <i>Death Undetermined</i><br><br>Additional information requested. | <i>Death Undetermined</i> |
| #195 | 23975 | PLA | Reported term: Death<br>Coded term: Death                                                                                                                                                 | The narrative contained no evidence to support the                                                                 | <i>Death Undetermined</i>                                          | <i>Death Undetermined</i> |

|      |       |     |                                                                                                                                                                          |                                                                                                                                              |                                                                    |                                                                         |
|------|-------|-----|--------------------------------------------------------------------------------------------------------------------------------------------------------------------------|----------------------------------------------------------------------------------------------------------------------------------------------|--------------------------------------------------------------------|-------------------------------------------------------------------------|
|      |       |     | Adjudication: Cardiovascular Death<br>Adjudicated cause of death: Death - Cardiovascular (Due To An Acute MI)                                                            | FOURIER Clinical Events Committee's adjudicated cause of death.                                                                              | Additional information requested.                                  |                                                                         |
| #198 | 23978 | PLA | Reported term: Death<br>Coded term: Death<br>Adjudication: Cardiovascular Death<br>Adjudicated cause of death: Death - Cardiovascular (Sudden Cardiac)                   | The narrative contained no evidence to support the FOURIER Clinical Events Committee's adjudicated cause of death.                           | <i>Death Undetermined</i><br><br>Additional information requested. | <i>Death Undetermined</i>                                               |
| #200 | 23980 | EVO | Reported term: Death<br>Coded term: Death<br>Adjudication: Non-Cardiovascular Death<br>Adjudicated cause of death: Death - Non-Cardiovascular (Trauma)                   | The narrative contained no evidence to support the FOURIER Clinical Events Committee's adjudicated cause of death.                           | <i>Death Undetermined</i><br><br>Additional information requested. | <i>Death Undetermined</i>                                               |
| #201 | 23981 | PLA | Reported term: Death<br>Coded term: Death<br>Adjudication: Cardiovascular Death<br>Adjudicated cause of death: Death - Cardiovascular (Sudden Cardiac)                   | The narrative contained no evidence to support the FOURIER Clinical Events Committee's adjudicated cause of death.                           | <i>Death Undetermined</i><br><br>Additional information requested. | <i>Death Undetermined</i>                                               |
| #202 | 23982 | PLA | Reported term: Death<br>Coded term: Death<br>Adjudication: Cardiovascular Death<br>Adjudicated cause of death: Death - Cardiovascular (Due To Cardiovascular Procedures) | The narratives read <i>on Day 241 the subject experienced angina unstable (Grade 4) and died on day 244 with an outcome of not resolved.</i> |                                                                    | Re-adjudication:<br><i>Death – Cardiovascular (Due To Other Causes)</i> |
| #206 | 23986 | EVO | Reported term: Death<br>Coded term: Death<br>Adjudication: Cardiovascular Death<br>Adjudicated cause of death: Death - Cardiovascular (Sudden Cardiac)                   | The narrative contained no evidence to support the FOURIER Clinical Events Committee's adjudicated cause of death.                           | <i>Death Undetermined</i><br><br>Additional information requested. | <i>Death Undetermined</i>                                               |

|      |       |     |                                                                                                                                                                                      |                                                                                                                      |                                                                    |                                                                                         |
|------|-------|-----|--------------------------------------------------------------------------------------------------------------------------------------------------------------------------------------|----------------------------------------------------------------------------------------------------------------------|--------------------------------------------------------------------|-----------------------------------------------------------------------------------------|
| #212 | 23992 | PLA | Reported term: Death<br>Coded term: Death<br>Adjudication: Cardiovascular Death<br>Adjudicated cause of death: Death - Cardiovascular (Due To An Acute MI)                           | The narrative contained no evidence to support the FOURIER Clinical Events Committee's adjudicated cause of death.   | <i>Death Undetermined</i><br><br>Additional information requested. | <i>Death Undetermined</i>                                                               |
| #217 | 23997 | PLA | Reported term: Death<br>Coded term: Death<br>Adjudication: Cardiovascular Death<br>Adjudicated cause of death: Death - Cardiovascular (Due To Stroke)                                | The narrative contained no evidence to support the FOURIER Clinical Events Committee's adjudicated cause of death.   | <i>Death Undetermined</i><br><br>Additional information requested. | <i>Death Undetermined</i>                                                               |
| #218 | 23998 | PLA | Reported term: Death<br>Coded term: Death<br>Adjudication: Non-Cardiovascular Death<br>Adjudicated cause of death: Death - Non-Cardiovascular (Malignancy)                           | The narrative contained no evidence to support the FOURIER Clinical Events Committee's adjudicated cause of death.   | <i>Death Undetermined</i><br><br>Additional information requested. | <i>Death Undetermined</i>                                                               |
| #220 | 24000 | EVO | Reported term: Pulmonary embolism<br>Coded term: Pulmonary embolism<br>Adjudication: Non-Cardiovascular Death<br>Adjudicated cause of death: Death - Cardiovascular (Sudden Cardiac) | The narratives read <i>on Day 400 the subject experienced pulmonary embolism (Grade 4) with an outcome of fatal.</i> |                                                                    | <i>Death - Cardiovascular (Due To Other Cardiovascular Causes) (Pulmonary Embolism)</i> |
| #224 | 24004 | EVO | Reported term: Sudden death<br>Coded term: Sudden death<br>Adjudication: Cardiovascular Death<br>Adjudicated cause of death: Death - Cardiovascular (Sudden Cardiac)                 | The narrative contained no evidence to support the FOURIER Clinical Events Committee's adjudicated cause of death.   | <i>Death Undetermined</i><br><br>Additional information requested. | <i>Death Undetermined</i>                                                               |
| #227 | 24007 | PLA | Reported term: Sudden death<br>Coded term: Sudden death<br>Adjudication: Undetermined Death<br>Adjudicated cause of death: Death - Cardiovascular (Sudden Cardiac)                   | The narrative contained no evidence to support the FOURIER Clinical Events Committee's adjudicated cause of death.   | <i>Death Undetermined</i><br><br>Additional information requested. | <i>Death Undetermined</i>                                                               |

|      |       |     |                                                                                                                                                                                        |                                                                                                                                                                                                                                      |                                                                    |                                                      |
|------|-------|-----|----------------------------------------------------------------------------------------------------------------------------------------------------------------------------------------|--------------------------------------------------------------------------------------------------------------------------------------------------------------------------------------------------------------------------------------|--------------------------------------------------------------------|------------------------------------------------------|
| #233 | 24013 | EVO | Reported term: Death<br>Coded term: Death<br>Adjudication: Undetermined Death<br>Adjudicated cause of death: Death - Cardiovascular (Sudden Cardiac)                                   | The narrative contained no evidence to support the FOURIER Clinical Events Committee's adjudicated cause of death.                                                                                                                   | <i>Death Undetermined</i><br><br>Additional information requested. | <i>Death Undetermined</i>                            |
| #236 | 24016 | PLA | Reported term: Sudden death<br>Coded term: Sudden death<br>Adjudication: Undetermined Death<br>Adjudicated cause of death: Death - Cardiovascular (Sudden Cardiac)                     | The narrative contained no evidence to support the FOURIER Clinical Events Committee's adjudicated cause of death.                                                                                                                   | <i>Death Undetermined</i><br><br>Additional information requested. | <i>Death Undetermined</i>                            |
| #237 | 24017 | EVO | Reported term: Circulatory collapse<br>Coded term: Failure circulatory<br>Adjudication: Cardiovascular Death<br>Adjudicated cause of death: Death - Cardiovascular (Sudden Cardiac)    | The narratives read <i>on Day 838 the subject experienced cardiac failure congestive [heart failure, congestive] (Grade 4) and on Day 859 the subject experienced circulatory collapse [failure circulatory] (Grade 4) and died.</i> |                                                                    | <i>Death - Cardiovascular (Due To Heart Failure)</i> |
| #239 | 24019 | PLA | Reported term: Myocardial infarction<br>Coded term: Infarct myocardial<br>Adjudication: Cardiovascular Death<br>Adjudicated cause of death: Death - Cardiovascular (Sudden Cardiac)    | The narratives read <i>on Day 139 the subject experienced myocardial infarction [infarct myocardial] (Grade 4) with an outcome of fatal.</i>                                                                                         |                                                                    | <i>Death - Cardiovascular (Due To An Acute MI)</i>   |
| #240 | 24020 | EVO | Reported term: Breast cancer<br>Coded term: Early stage breast cancer<br>Adjudication: Non-Cardiovascular Death<br>Adjudicated cause of death: Death - Cardiovascular (Sudden Cardiac) | The patient was diagnosed with "breast cancer recurrent" on day 21 (grade 3) (CSR page 11907) and died on day 388 (grade 4).                                                                                                         |                                                                    | <i>Death - Non-Cardiovascular (Malignancy)</i>       |
| #245 | 24025 | EVO | Reported term: Pulmonary embolism<br>Coded term: Pulmonary embolism                                                                                                                    | The narratives read <i>on Day 749 the subject experienced</i>                                                                                                                                                                        |                                                                    | <i>Death - Cardiovascular (Due To Other</i>          |



|      |       |     |                                                                                                                                                                                   |                                                                                                                                   |                                                                    |                                                                                         |
|------|-------|-----|-----------------------------------------------------------------------------------------------------------------------------------------------------------------------------------|-----------------------------------------------------------------------------------------------------------------------------------|--------------------------------------------------------------------|-----------------------------------------------------------------------------------------|
|      |       |     | Adjudication: Cardiovascular Death<br>Adjudicated cause of death: Death - Cardiovascular (Sudden Cardiac)                                                                         | <i>pulmonary embolism (Grade 4) with an outcome of fatal.</i>                                                                     |                                                                    | <i>Cardiovascular Causes (Pulmonary Embolism)</i>                                       |
| #246 | 24026 | EVO | Reported term: Hepatic failure<br>Coded term: Hepatic failure<br>Adjudication: Non-cardiovascular Death<br>Adjudicated cause of death: Death - Non-Cardiovascular (Hepatobiliary) | The narratives read <i>on Day 575 the subject experienced ischaemic cerebral infarction (Grade 4)</i> and died on Day 576.        |                                                                    | <i>Death - Cardiovascular (Due To Stroke)</i>                                           |
| #248 | 24029 | EVO | Reported term: Drowning<br>Coded term: Drowning<br>Adjudication: Non-cardiovascular Death<br>Adjudicated cause of death: Death - Cardiovascular (Sudden Cardiac)                  | The narrative contained no evidence to support the FOURIER Clinical Events Committee's adjudicated cause of death.                |                                                                    | <i>Death - Non-Cardiovascular (Drowning)</i>                                            |
| #250 | 24031 | PLA | Reported term: Cardiac failure<br>Coded term: Heart failure<br>Adjudication: Cardiovascular Death<br>Adjudicated cause of death: Death - Cardiovascular (Sudden Cardiac)          | The narratives read <i>on Day 308 the subject experienced cardiac failure [heart failure] (Grade 4)</i> with an outcome of fatal. |                                                                    | <i>Death - Cardiovascular (Due To Heart Failure)</i>                                    |
| #254 | 24035 | PLA | Reported term: Pulmonary embolism<br>Coded term: Pulmonary embolism<br>Adjudication: Cardiovascular Death<br>Adjudicated cause of death: Death - Cardiovascular (Sudden Cardiac)  | The narratives read <i>on Day 407 the subject experienced pulmonary embolism (Grade 4) with an outcome of fatal.</i>              |                                                                    | <i>Death - Cardiovascular (Due To Other Cardiovascular Causes) (Pulmonary Embolism)</i> |
| #255 | 24036 | EVO | Reported term: Death<br>Coded term: Death<br>Adjudication: Cardiovascular Death<br>Adjudicated cause of death: Death - Cardiovascular (Due To Heart Failure)                      | The narrative contained no evidence to support the FOURIER Clinical Events Committee's adjudicated cause of death.                | <i>Death Undetermined</i><br><br>Additional information requested. | <i>Death Undetermined</i>                                                               |
| #257 | 24038 | PLA | Reported term: Cardiac arrest<br>Coded term: Cardiac arrest<br>Adjudication: Cardiovascular Death                                                                                 | The narratives read <i>on Day 159 the subject experienced</i>                                                                     |                                                                    | <i>Death - Cardiovascular (Sudden Cardiac)</i>                                          |

|      |       |     |                                                                                                                                                                             |                                                                                                                                   |                                                                    |                                                                |
|------|-------|-----|-----------------------------------------------------------------------------------------------------------------------------------------------------------------------------|-----------------------------------------------------------------------------------------------------------------------------------|--------------------------------------------------------------------|----------------------------------------------------------------|
|      |       |     | Adjudicated cause of death: Death - Undetermined                                                                                                                            | <i>cardiac arrest (Grade 4) with an outcome of fatal.</i>                                                                         |                                                                    |                                                                |
| #260 | 24041 | EVO | Reported term: Death<br>Coded term: Death<br>Adjudication: Cardiovascular Death<br>Adjudicated cause of death: Death - Cardiovascular (Sudden Cardiac)                      | The narrative contained no evidence to support the FOURIER Clinical Events Committee's adjudicated cause of death.                | <i>Death Undetermined</i><br><br>Additional information requested. | <i>Death Undetermined</i>                                      |
| #263 | 24044 | EVO | Reported term: Death<br>Coded term: Death<br>Adjudication: Cardiovascular Death<br>Adjudicated cause of death: Death - Cardiovascular (Sudden Cardiac)                      | The narrative contained no evidence to support the FOURIER Clinical Events Committee's adjudicated cause of death.                | <i>Death Undetermined</i><br><br>Additional information requested. | <i>Death Undetermined</i>                                      |
| #269 | 24050 | PLA | Reported term: Pneumonia<br>Coded term: Bilateral pneumonia<br>Adjudication: Non-Cardiovascular Death<br>Adjudicated cause of death: Death - Cardiovascular (Due To Stroke) | The narratives read <i>on Day 165 the subject experienced pneumonia [bilateral pneumonia] (Grade 4) with an outcome of fatal.</i> |                                                                    | <i>Death - Non-Cardiovascular (Infection; Includes Sepsis)</i> |
| #270 | 24051 | PLA | Reported term: Death<br>Coded term: Death<br>Adjudication: Undetermined Death<br>Adjudicated cause of death: Death - Cardiovascular (Sudden Cardiac)                        | The narrative contained no evidence to support the FOURIER Clinical Events Committee's adjudicated cause of death.                | <i>Death Undetermined</i><br><br>Additional information requested. | <i>Death Undetermined</i>                                      |
| #271 | 24052 | PLA | Reported term: Death<br>Coded term: Death<br>Adjudication: Undetermined Death<br>Adjudicated cause of death: Death - Cardiovascular (Sudden Cardiac)                        | The narrative contained no evidence to support the FOURIER Clinical Events Committee's adjudicated cause of death.                | <i>Death Undetermined</i><br><br>Additional information requested. | <i>Death Undetermined</i>                                      |
| #273 | 24054 | EVO | Reported term: Stroke in evolution<br>Coded term: Stroke in progression<br>Adjudication: Cardiovascular Death                                                               | The narratives read <i>on Day 15 the subject experienced stroke in evolution [stroke in</i>                                       |                                                                    | <i>Death - Cardiovascular (Due To Stroke)</i>                  |

|      |       |     |                                                                                                                                                            |                                                                                                                    |                                                                    |                                                                                         |
|------|-------|-----|------------------------------------------------------------------------------------------------------------------------------------------------------------|--------------------------------------------------------------------------------------------------------------------|--------------------------------------------------------------------|-----------------------------------------------------------------------------------------|
|      |       |     | Adjudicated cause of death: Death - Cardiovascular (Sudden Cardiac)                                                                                        | <i>progression] (Grade 4) with an outcome of fatal.</i>                                                            |                                                                    |                                                                                         |
| #274 | 24055 | EVO | Reported term: Death<br>Coded term: Death<br>Adjudication: Non-Cardiovascular Death<br>Adjudicated cause of death: Death - Cardiovascular (Due To Stroke)  | The narrative contained no evidence to support the FOURIER Clinical Events Committee's adjudicated cause of death. | <i>Death Undetermined</i><br><br>Additional information requested. | <i>Death Undetermined</i>                                                               |
| #276 | 24057 | PLA | Reported term: Death<br>Coded term: Death<br>Adjudication: Undetermined Death<br>Adjudicated cause of death: Death - Cardiovascular (Sudden Cardiac)       | The narrative contained no evidence to support the FOURIER Clinical Events Committee's adjudicated cause of death. | <i>Death Undetermined</i><br><br>Additional information requested. | <i>Death Undetermined</i>                                                               |
| #277 | 24058 | EVO | Reported term: Death<br>Coded term: Death<br>Adjudication: Cardiovascular Death<br>Adjudicated cause of death: Death - Cardiovascular (Sudden Cardiac)     | The narrative contained no evidence to support the FOURIER Clinical Events Committee's adjudicated cause of death. | <i>Death Undetermined</i><br><br>Additional information requested. | <i>Death Undetermined</i>                                                               |
| #279 | 24060 | EVO | Reported term: Death<br>Coded term: Death<br>Adjudication: Non-Cardiovascular Death<br>Adjudicated cause of death: Death - Cardiovascular (Due To Stroke)  | The narrative contained no evidence to support the FOURIER Clinical Events Committee's adjudicated cause of death. | <i>Death Undetermined</i><br><br>Additional information requested. | <i>Death Undetermined</i>                                                               |
| #280 | 24061 | EVO | Reported term: Death<br>Coded term: Death<br>Adjudication: Cardiovascular Death<br>Adjudicated cause of death: Death - Cardiovascular (Due To An Acute MI) | The narrative contained no evidence to support the FOURIER Clinical Events Committee's adjudicated cause of death. | <i>Death Undetermined</i><br><br>Additional information requested. | <i>Death Undetermined</i>                                                               |
| #282 | 24063 | EVO | Reported term: Pulmonary embolism<br>Coded term: Acute massive pulmonary embolism<br>Adjudication: Non-Cardiovascular Death                                | The narratives read <i>on Day 406 the subject experienced pulmonary embolism [acute massive pulmonary</i>          |                                                                    | <i>Death - Cardiovascular (Due To Other Cardiovascular Causes) (Pulmonary Embolism)</i> |

|      |       |     |                                                                                                                                                                            |                                                                                                                                     |                                                                    |                                               |
|------|-------|-----|----------------------------------------------------------------------------------------------------------------------------------------------------------------------------|-------------------------------------------------------------------------------------------------------------------------------------|--------------------------------------------------------------------|-----------------------------------------------|
|      |       |     | Adjudicated cause of death: Death - Non-Cardiovascular (Malignancy)                                                                                                        | <i>embolism] with an outcome of fatal.</i>                                                                                          |                                                                    |                                               |
| #284 | 24065 | PLA | Reported term: Death<br>Coded term: Unknown cause of death<br>Adjudication: Undetermined Death<br>Adjudicated cause of death: Death - Cardiovascular (Sudden Cardiac)      | The narratives read <i>on Day 17 the subject experienced death [unknown cause of death] (Grade 4).</i>                              |                                                                    | <i>Death Undetermined</i>                     |
| #285 | 24066 | PLA | Reported term: Cerebrovascular accident<br>Coded term: Stroke<br>Adjudication: Cardiovascular Death<br>Adjudicated cause of death: Death - Cardiovascular (Sudden Cardiac) | The narratives read <i>on Day 212 the subject experienced cerebrovascular accident [stroke] (Grade 4) with an outcome of fatal.</i> |                                                                    | <i>Death - Cardiovascular (Due To Stroke)</i> |
| #287 | 24070 | EVO | Reported term: Death<br>Coded term: Death<br>Adjudication: Cardiovascular Death<br>Adjudicated cause of death: Death - Cardiovascular (Due To Cardiovascular Hemorrhage)   | The narrative contained no evidence to support the FOURIER Clinical Events Committee's adjudicated cause of death.                  | <i>Death Undetermined</i><br><br>Additional information requested. | <i>Death Undetermined</i>                     |
| #291 | 24074 | EVO | Reported term: Death<br>Coded term: Death<br>Adjudication: Non-Cardiovascular Death<br>Adjudicated cause of death: Death - Cardiovascular (Due To Stroke)                  | The narrative contained no evidence to support the FOURIER Clinical Events Committee's adjudicated cause of death.                  | <i>Death Undetermined</i><br><br>Additional information requested. | <i>Death Undetermined</i>                     |
| #295 | 24078 | PLA | Reported term: Death<br>Coded term: Death<br>Adjudication: Cardiovascular Death<br>Adjudicated cause of death: Death - Cardiovascular (Sudden Cardiac)                     | The narrative contained no evidence to support the FOURIER Clinical Events Committee's adjudicated cause of death.                  | <i>Death Undetermined</i><br><br>Additional information requested. | <i>Death Undetermined</i>                     |
| #298 | 24081 | PLA | Reported term: Death<br>Coded term: Death<br>Adjudication: Cardiovascular Death                                                                                            | The narrative contained no evidence to support the FOURIER Clinical Events                                                          | <i>Death Undetermined</i>                                          | <i>Death Undetermined</i>                     |

|      |       |     | Adjudicated cause of death: Death - Cardiovascular (Due To An Acute MI)                                                                                                                             | Committee's adjudicated cause of death.                                                                                                                             | Additional information requested.                                  |                                                                |
|------|-------|-----|-----------------------------------------------------------------------------------------------------------------------------------------------------------------------------------------------------|---------------------------------------------------------------------------------------------------------------------------------------------------------------------|--------------------------------------------------------------------|----------------------------------------------------------------|
| #305 | 24088 | PLA | Reported term: Chest pain<br>Coded term: Chest pain<br>Adjudication: Cardiovascular Death<br>Adjudicated cause of death: Death - Cardiovascular (Sudden Cardiac)                                    | The narrative contained no evidence to support the FOURIER Clinical Events Committee's adjudicated cause of death.                                                  | <i>Death Undetermined</i><br><br>Additional information requested. | <i>Death Undetermined</i>                                      |
| #308 | 24091 | PLA | Reported term: Respiratory failure<br>Coded term: Respiratory failure<br>Adjudication: Non-Cardiovascular Death<br>Adjudicated cause of death: Death - Cardiovascular (Due To Heart Failure)        | The narratives read <i>on Day 362 the subject experienced respiratory failure (Grade 4) with an outcome of fatal.</i>                                               |                                                                    | <i>Death - Non-Cardiovascular (Pulmonary)</i>                  |
| #309 | 24092 | PLA | Reported term: Death<br>Coded term: Death<br>Adjudication: Non-Cardiovascular Death<br>Adjudicated cause of death: Death - Cardiovascular (Due To Other Cardiovascular Causes) (Pulmonary Embolism) | The narrative contained no evidence to support the FOURIER Clinical Events Committee's adjudicated cause of death.                                                  | <i>Death Undetermined</i><br><br>Additional information requested. | <i>Death Undetermined</i>                                      |
| #317 | 24101 | EVO | Reported term: Bacterial infection<br>Coded term: Infection bacterial<br>Adjudication: Non-Cardiovascular Death<br>Adjudicated cause of death: Death - Cardiovascular (Due To Stroke)               | The narratives read <i>on Day 33 the subject experienced pneumonia aspiration [aspiration pneumonia] (Grade 4) and on Day 57 the subject died due to the event.</i> |                                                                    | <i>Death - Non-Cardiovascular (Infection; Includes Sepsis)</i> |
| #319 | 24103 | PLA | Reported term: Acute myocardial infarction<br>Coded term: Acute myocardial infarction<br>Adjudication: Cardiovascular Death<br>Adjudicated cause of death: Death - Cardiovascular (Sudden Cardiac)  | The narratives read <i>on Day 233 the subject experienced acute myocardial infarction (Grade 4) with an outcome of fatal.</i>                                       |                                                                    | <i>Death - Cardiovascular (Due To An Acute MI)</i>             |

|      |       |     |                                                                                                                                                                                       |                                                                                                                                                                       |                                                                    |                                                                |
|------|-------|-----|---------------------------------------------------------------------------------------------------------------------------------------------------------------------------------------|-----------------------------------------------------------------------------------------------------------------------------------------------------------------------|--------------------------------------------------------------------|----------------------------------------------------------------|
| #320 | 24104 | PLA | Reported term: Foetal death<br>Coded term: Death fetal<br>Adjudication: Cardiovascular Death<br>Adjudicated cause of death: Death - Cardiovascular (Due To Cardiovascular Procedures) | The narratives read <i>on Day 1033 the subject experienced foetal death [death fetal] (Grade 4)</i> . This is clearly a mistake and Additional information requested. | <i>Death Undetermined</i><br><br>Additional information requested. | <i>Death Undetermined</i>                                      |
| #321 | 24105 | EVO | Reported term: Death<br>Coded term: Death<br>Adjudication: Cardiovascular Death<br>Adjudicated cause of death: Death - Cardiovascular (Sudden Cardiac)                                | The narrative contained no evidence to support the FOURIER Clinical Events Committee's adjudicated cause of death.                                                    | <i>Death Undetermined</i><br><br>Additional information requested. | <i>Death Undetermined</i>                                      |
| #326 | 24110 | PLA | Reported term: Death<br>Coded term: Death<br>Adjudication: Cardiovascular Death<br>Adjudicated cause of death: Death - Cardiovascular (Due To Heart Failure)                          | The narrative contained no evidence to support the FOURIER Clinical Events Committee's adjudicated cause of death.                                                    | <i>Death Undetermined</i><br><br>Additional information requested. | <i>Death Undetermined</i>                                      |
| #332 | 24117 | PLA | Reported term: Death<br>Coded term: Death<br>Adjudication: Non-Cardiovascular Death<br>Adjudicated cause of death: Death - Cardiovascular (Due To Stroke)                             | The narrative contained no evidence to support the FOURIER Clinical Events Committee's adjudicated cause of death.                                                    | <i>Death Undetermined</i><br><br>Additional information requested. | <i>Death Undetermined</i>                                      |
| #342 | 24127 | EVO | Reported term: Death<br>Coded term: Death<br>Adjudication: Cardiovascular Death<br>Adjudicated cause of death: Death - Cardiovascular (Due To An Acute MI)                            | The narratives read <i>on Day 338 the subject experienced cardiac failure [heart failure] (Grade 4) and died</i> .                                                    |                                                                    | <i>Death - Cardiovascular (Due To Heart Failure)</i>           |
| #344 | 24129 | EVO | Reported term: Pneumonia aspiration<br>Coded term: Aspiration pneumonia<br>Adjudication: Non-Cardiovascular Death                                                                     | The narratives read <i>on Day 1148 the subject experienced pneumonia aspiration [aspiration pneumonia]</i>                                                            |                                                                    | <i>Death - Non-Cardiovascular (Infection; Includes Sepsis)</i> |

|      |       |     |                                                                                                                                                                            |                                                                                                                    |                                                                    |                                                    |
|------|-------|-----|----------------------------------------------------------------------------------------------------------------------------------------------------------------------------|--------------------------------------------------------------------------------------------------------------------|--------------------------------------------------------------------|----------------------------------------------------|
|      |       |     | Adjudicated cause of death: Death - Non-Cardiovascular (Pulmonary)                                                                                                         | <i>(Grade 4) with an outcome of fatal.</i>                                                                         |                                                                    |                                                    |
| #346 | 24131 | EVO | Reported term: Death<br>Coded term: Dead on arrival<br>Adjudication: Undetermined Death<br>Adjudicated cause of death: Death - Cardiovascular (Sudden Cardiac)             | The narrative contained no evidence to support the FOURIER Clinical Events Committee's adjudicated cause of death. | <i>Death Undetermined</i><br><br>Additional information requested. | <i>Death Undetermined</i>                          |
| #347 | 24132 | PLA | Reported term: Death<br>Coded term: Unknown cause of death<br>Adjudication: Undetermined Death<br>Adjudicated cause of death: Death - Cardiovascular (Sudden Cardiac)      | The narratives read <i>on Day 438 the subject experienced death [unknown cause of death] (Grade 4).</i>            |                                                                    | <i>Death Undetermined</i>                          |
| #350 | 24136 | PLA | Reported term: Death<br>Coded term: Unknown cause of death<br>Adjudication: Undetermined Death<br>Adjudicated cause of death: Death - Cardiovascular (Sudden Cardiac)      | The narratives read <i>on Day 754 the subject experienced death [unknown cause of death] (Grade 4).</i>            |                                                                    | <i>Death Undetermined</i>                          |
| #351 | 24137 | PLA | Reported term: Death<br>Coded term: Death<br>Adjudication: Non-Cardiovascular Death<br>Adjudicated cause of death: Death - Non-Cardiovascular (Infection; Includes Sepsis) | The narrative contained no evidence to support the FOURIER Clinical Events Committee's adjudicated cause of death. | <i>Death Undetermined</i><br><br>Additional information requested. | <i>Death Undetermined</i>                          |
| #352 | 24138 | EVO | Reported term: Death<br>Coded term: Death NOS<br>Adjudication: Cardiovascular Death<br>Adjudicated cause of death: Death - Cardiovascular (Sudden Cardiac)                 | The narrative contained no evidence to support the FOURIER Clinical Events Committee's adjudicated cause of death. | <i>Death Undetermined</i><br><br>Additional information requested. | <i>Death Undetermined</i>                          |
| #355 | 24141 | EVO | Reported term: Myocardial infarction<br>Coded term: Sudden cardiac death probably secondary to myocardial infarction<br>Adjudication: Cardiovascular Death                 | The narratives read <i>on Day 432 the subject experienced myocardial infarction [sudden cardiac death</i>          |                                                                    | <i>Death - Cardiovascular (Due To An Acute MI)</i> |

|      |       |     |                                                                                                                                                                               |                                                                                                                    |                                                                |                                                |
|------|-------|-----|-------------------------------------------------------------------------------------------------------------------------------------------------------------------------------|--------------------------------------------------------------------------------------------------------------------|----------------------------------------------------------------|------------------------------------------------|
|      |       |     | Adjudicated cause of death: Death - Cardiovascular (Sudden Cardiac)                                                                                                           | <i>probably secondary to myocardial infarction] (Grade 4) with an outcome of fatal.</i>                            |                                                                |                                                |
| #356 | 24142 | PLA | Reported term: Cardiac arrest<br>Coded term: Cardiac arrest<br>Adjudication: Non- Cardiovascular Death<br>Adjudicated cause of death: Death - Non-Cardiovascular (Malignancy) | The narratives read <i>on Day 466 the subject experienced cardiac arrest (Grade 4) with an outcome of fatal.</i>   |                                                                | <i>Death - Cardiovascular (Sudden Cardiac)</i> |
| #357 | 24143 | PLA | Reported term: Death<br>Coded term: Dead on arrival<br>Adjudication: Cardiovascular Death<br>Adjudicated cause of death: Death - Cardiovascular (Sudden Cardiac)              | The narratives read <i>on Day 432 the subject experienced death [dead on arrival] (Grade 4).</i>                   |                                                                | <i>Death Undetermined</i>                      |
| #358 | 24144 | EVO | Reported term: Death<br>Coded term: Death<br>Adjudication: Cardiovascular Death<br>Adjudicated cause of death: Death - Cardiovascular (Sudden Cardiac)                        | The narrative contained no evidence to support the FOURIER Clinical Events Committee's adjudicated cause of death. | <i>Death Undetermined</i><br>Additional information requested. | <i>Death Undetermined</i>                      |
| #360 | 24146 | PLA | Reported term: Death<br>Coded term: Death<br>Adjudication: Cardiovascular Death<br>Adjudicated cause of death: Death - Cardiovascular (Sudden Cardiac)                        | The narrative contained no evidence to support the FOURIER Clinical Events Committee's adjudicated cause of death. | <i>Death Undetermined</i><br>Additional information requested. | <i>Death Undetermined</i>                      |
| #361 | 24147 | EVO | Reported term: Death<br>Coded term: Death<br>Adjudication: Non-Cardiovascular Death<br>Adjudicated cause of death: Death - Cardiovascular (Due To Stroke)                     | The narrative contained no evidence to support the FOURIER Clinical Events Committee's adjudicated cause of death. | <i>Death Undetermined</i><br>Additional information requested. | <i>Death Undetermined</i>                      |
| #366 | 24152 | PLA | Reported term: Death<br>Coded term: Death                                                                                                                                     | The narrative contained no evidence to support the                                                                 | <i>Death Undetermined</i>                                      | <i>Death Undetermined</i>                      |



|      |       |     |                                                                                                                                                                                                                                                              |                                                                                                                                                                                                                                                                                                                       |                                                                    |                                                    |
|------|-------|-----|--------------------------------------------------------------------------------------------------------------------------------------------------------------------------------------------------------------------------------------------------------------|-----------------------------------------------------------------------------------------------------------------------------------------------------------------------------------------------------------------------------------------------------------------------------------------------------------------------|--------------------------------------------------------------------|----------------------------------------------------|
|      |       |     | Adjudication: Undetermined Death<br>Adjudicated cause of death: Death - Cardiovascular (Sudden Cardiac)                                                                                                                                                      | FOURIER Clinical Events Committee's adjudicated cause of death.                                                                                                                                                                                                                                                       | Additional information requested.                                  |                                                    |
| #368 | 24154 | EVO | Reported term: Cardiovascular disorder<br>Coded term: Cardiovascular death - post surgical coronary revascularisation (OPCAB)<br>Adjudication: Cardiovascular Death<br>Adjudicated cause of death: Death - Cardiovascular (Due To Cardiovascular Procedures) | The narratives read <i>on Day 554 the subject experienced cardiac failure [heart failure] (Grade 4) and myocardial infarction (Grade 4). On Day 554 the subject experienced cardiovascular disorder [cardiovascular death - post surgical coronary revascularisation (opcab)] (Grade 4) with an outcome of fatal.</i> |                                                                    | <i>Death - Cardiovascular (Due To An Acute MI)</i> |
| #369 | 24155 | EVO | Reported term: Death<br>Coded term: Death<br>Adjudication: Cardiovascular Death<br>Adjudicated cause of death: Death - Cardiovascular (Sudden Cardiac)                                                                                                       | The narrative contained no evidence to support the FOURIER Clinical Events Committee's adjudicated cause of death.                                                                                                                                                                                                    | <i>Death Undetermined</i><br><br>Additional information requested. | <i>Death Undetermined</i>                          |
| #373 | 24159 | EVO | Reported term: Death<br>Coded term: Death<br>Adjudication: Cardiovascular Death<br>Adjudicated cause of death: Death - Cardiovascular (Due To Heart Failure)                                                                                                 | The narrative contained no evidence to support the FOURIER Clinical Events Committee's adjudicated cause of death.                                                                                                                                                                                                    | <i>Death Undetermined</i><br><br>Additional information requested. | <i>Death Undetermined</i>                          |
| #373 | 24162 | EVO | Reported term: Sudden death<br>Coded term: Sudden death<br>Adjudication: Undetermined Death<br>Adjudicated cause of death: Death - Cardiovascular (Sudden Cardiac)                                                                                           | The narrative contained no evidence to support the FOURIER Clinical Events Committee's adjudicated cause of death.                                                                                                                                                                                                    | <i>Death Undetermined</i><br><br>Additional information requested. | <i>Death Undetermined</i>                          |

|      |       |     |                                                                                                                                                                                                                   |                                                                                                                                                                        |                                                                    |                                                                   |
|------|-------|-----|-------------------------------------------------------------------------------------------------------------------------------------------------------------------------------------------------------------------|------------------------------------------------------------------------------------------------------------------------------------------------------------------------|--------------------------------------------------------------------|-------------------------------------------------------------------|
| #378 | 24164 | PLA | Reported term: Upper gastrointestinal haemorrhage<br>Coded term: Upper gastrointestinal bleeding<br>Adjudication: Non-Cardiovascular Death<br>Adjudicated cause of death: Death - Cardiovascular (Sudden Cardiac) | The narratives read <i>on Day 130 the subject experienced upper gastrointestinal haemorrhage [upper gastrointestinal bleeding] (Grade 4) with an outcome of fatal.</i> |                                                                    | <i>Death - Non-Cardiovascular (Non-Cardiovascular Hemorrhage)</i> |
| #386 | 24173 | EVO | Reported term: Death<br>Coded term: Death<br>Adjudication: Undetermined Death<br>Adjudicated cause of death: Death - Cardiovascular (Sudden Cardiac)                                                              | The narrative contained no evidence to support the FOURIER Clinical Events Committee's adjudicated cause of death.                                                     | <i>Death Undetermined</i><br><br>Additional information requested. | <i>Death Undetermined</i>                                         |
| #389 | 24176 | PLA | Reported term: Death<br>Coded term: Death<br>Adjudication: Non-Cardiovascular Death<br>Adjudicated cause of death: Death - Cardiovascular (Due To Stroke)                                                         | The narrative contained no evidence to support the FOURIER Clinical Events Committee's adjudicated cause of death.                                                     | <i>Death Undetermined</i><br><br>Additional information requested. | <i>Death Undetermined</i>                                         |
| #392 | 24179 | EVO | Reported term: Death<br>Coded term: Death unexplained<br>Adjudication: Undetermined Death<br>Adjudicated cause of death: Death - Cardiovascular (Sudden Cardiac)                                                  | The narratives read <i>on Day 556 the subject experienced death [death unexplained] (Grade 4).</i>                                                                     |                                                                    | <i>Death Undetermined</i>                                         |
| #393 | 24180 | PLA | Reported term: Sudden death<br>Coded term: Sudden death<br>Adjudication: Undetermined Death<br>Adjudicated cause of death: Death - Cardiovascular (Sudden Cardiac)                                                | The narrative contained no evidence to support the FOURIER Clinical Events Committee's adjudicated cause of death.                                                     | <i>Death Undetermined</i><br><br>Additional information requested. | <i>Death Undetermined</i>                                         |
| #396 | 24183 | EVO | Reported term: Cardiac failure<br>Coded term: Heart failure<br>Adjudication: Cardiovascular Death                                                                                                                 | The narratives read <i>on Day 546 the subject experienced cardiac failure [heart failure]</i>                                                                          |                                                                    | <i>Death - Cardiovascular (Due To Heart Failure)</i>              |

|      |       |     |                                                                                                                                                                     |                                                                                                                                                      |                                                                    |                                                      |
|------|-------|-----|---------------------------------------------------------------------------------------------------------------------------------------------------------------------|------------------------------------------------------------------------------------------------------------------------------------------------------|--------------------------------------------------------------------|------------------------------------------------------|
|      |       |     | Adjudicated cause of death: Death – Undetermined                                                                                                                    | <i>(Grade 4) with an outcome of fatal.</i>                                                                                                           |                                                                    |                                                      |
| #399 | 24186 | PLA | Reported term: Death<br>Coded term: Death<br>Adjudication: Undetermined Death<br>Adjudicated cause of death: Death - Cardiovascular (Sudden Cardiac)                | The narrative contained no evidence to support the FOURIER Clinical Events Committee’s adjudicated cause of death.                                   | <i>Death Undetermined</i><br><br>Additional information requested. | <i>Death Undetermined</i>                            |
| #401 | 24188 | PLA | Reported term: Death<br>Coded term: Death<br>Adjudication: Non-Cardiovascular Death<br>Adjudicated cause of death: Death - Non-Cardiovascular (Malignancy)          | The narrative contained no evidence to support the FOURIER Clinical Events Committee’s adjudicated cause of death.                                   | <i>Death Undetermined</i><br><br>Additional information requested. | <i>Death Undetermined</i>                            |
| #402 | 24189 | PLA | Reported term: Death<br>Coded term: Death<br>Adjudication: Cardiovascular Death<br>Adjudicated cause of death: Death - Undetermined                                 | The narratives read <i>on day 9 the subject experienced lung neoplasm [left lung tumor of unspecified character] (Grade 4)</i> , and died on day 29. |                                                                    | <i>Death - Non-Cardiovascular (Malignancy)</i>       |
| #406 | 24193 | EVO | Reported term: Death<br>Coded term: Death unexplained<br>Adjudication: Undetermined Death<br>Adjudicated cause of death: Death - Cardiovascular (Sudden Cardiac)    | The narratives read <i>on Day 303 the subject experienced death [death unexplained] (Grade 4)</i> .                                                  |                                                                    | <i>Death Undetermined</i>                            |
| #410 | 24197 | PLA | Reported term: Myocardial infarction<br>Coded term: Myocardial infarction<br>Adjudication: Cardiovascular Death<br>Adjudicated cause of death: Death - Undetermined | The narratives read <i>on Day 124 the subject experienced myocardial infarction (Grade 4) with an outcome of fatal.</i>                              |                                                                    | <i>Death - Cardiovascular (Due To An Acute MI)</i>   |
| #412 | 24199 | EVO | Reported term: Cardiac failure<br>Coded term: Heart failure                                                                                                         | The narratives read <i>on Day 60 the subject experienced</i>                                                                                         |                                                                    | <i>Death - Cardiovascular (Due To Heart Failure)</i> |

|      |       |     |                                                                                                                                                                          |                                                                                                                                                 |                                                                    |                                               |
|------|-------|-----|--------------------------------------------------------------------------------------------------------------------------------------------------------------------------|-------------------------------------------------------------------------------------------------------------------------------------------------|--------------------------------------------------------------------|-----------------------------------------------|
|      |       |     | Adjudication: Cardiovascular Death<br>Adjudicated cause of death: Death - Cardiovascular (Sudden Cardiac)                                                                | <i>cardiac failure [heart failure] (Grade 4) with an outcome of fatal.</i>                                                                      |                                                                    |                                               |
| #413 | 24200 | PLA | Reported term: Sudden death<br>Coded term: Sudden death<br>Adjudication: Undetermined Death<br>Adjudicated cause of death: Death - Cardiovascular (Sudden Cardiac)       | The narrative contained no evidence to support the FOURIER Clinical Events Committee's adjudicated cause of death.                              | <i>Death Undetermined</i><br><br>Additional information requested. | <i>Death Undetermined</i>                     |
| #414 | 24201 | PLA | Reported term: Sudden death<br>Coded term: Sudden death<br>Adjudication: Undetermined Death<br>Adjudicated cause of death: Death - Cardiovascular (Sudden Cardiac)       | The narrative contained no evidence to support the FOURIER Clinical Events Committee's adjudicated cause of death.                              | <i>Death Undetermined</i><br><br>Additional information requested. | <i>Death Undetermined</i>                     |
| #417 | 24205 | PLA | Reported term: Cerebrovascular accident<br>Coded term: Death due to stroke<br>Adjudication: Non-Cardiovascular Death<br>Adjudicated cause of death: Death - Undetermined | The narratives read <i>on Day 48 the subject experienced cerebrovascular accident [death due to stroke] (Grade 4) with an outcome of fatal.</i> |                                                                    | <i>Death - Cardiovascular (Due To Stroke)</i> |
| #420 | 24209 | PLA | Reported term: Sudden death<br>Coded term: Sudden death<br>Adjudication: Undetermined Death<br>Adjudicated cause of death: Death - Cardiovascular (Sudden Cardiac)       | The narrative contained no evidence to support the FOURIER Clinical Events Committee's adjudicated cause of death.                              | <i>Death Undetermined</i><br><br>Additional information requested. | <i>Death Undetermined</i>                     |
| #422 | 24211 | PLA | Reported term: Sudden death<br>Coded term: Sudden death<br>Adjudication: Undetermined Death<br>Adjudicated cause of death: Death - Cardiovascular (Sudden Cardiac)       | The narrative contained no evidence to support the FOURIER Clinical Events Committee's adjudicated cause of death.                              | <i>Death Undetermined</i><br><br>Additional information requested. | <i>Death Undetermined</i>                     |
| #424 | 24213 | EVO | Reported term: Influenza<br>Coded term: Influenza A virus infection<br>Adjudication: Non-Cardiovascular Death                                                            | The narratives read <i>on Day 840 the subject experienced influenza [influenza a virus</i>                                                      |                                                                    | <i>Death - Cardiovascular (Due To Stroke)</i> |

|      |       |     |                                                                                                                                                                       |                                                                                                                                                                                                                       |                                                                    |                                                                |
|------|-------|-----|-----------------------------------------------------------------------------------------------------------------------------------------------------------------------|-----------------------------------------------------------------------------------------------------------------------------------------------------------------------------------------------------------------------|--------------------------------------------------------------------|----------------------------------------------------------------|
|      |       |     | Adjudicated cause of death: Death - Cardiovascular (Sudden Cardiac)                                                                                                   | <i>infection] (Grade 4), and also cardiac failure chronic [chronic heart failure exacerbation] (Grade 4) and subarachnoid haemorrhage [subarachnoid hemorrhage] (Grade 4) (CSR page 14529), and died on that day.</i> |                                                                    |                                                                |
| #428 | 24218 | EVO | Reported term: Sudden death<br>Coded term: Sudden death<br>Adjudication: Undetermined Death<br>Adjudicated cause of death: Death - Cardiovascular (Sudden Cardiac)    | The narrative contained no evidence to support the FOURIER Clinical Events Committee's adjudicated cause of death.                                                                                                    | <i>Death Undetermined</i><br><br>Additional information requested. | <i>Death Undetermined</i>                                      |
| #429 | 24219 | PLA | Reported term: Sudden death<br>Coded term: Sudden death<br>Adjudication: Undetermined Death<br>Adjudicated cause of death: Death - Cardiovascular (Sudden Cardiac)    | The narrative contained no evidence to support the FOURIER Clinical Events Committee's adjudicated cause of death.                                                                                                    | <i>Death Undetermined</i><br><br>Additional information requested. | <i>Death Undetermined</i>                                      |
| #436 | 24227 | EVO | Reported term: Pneumonia<br>Coded term: Pneumonia<br>Adjudication: Non-Cardiovascular Death<br>Adjudicated cause of death: Death - Cardiovascular (Sudden Cardiac)    | The narratives read <i>on Day 487 the subject experienced pneumonia (Grade 4) with an outcome of fatal.</i>                                                                                                           |                                                                    | <i>Death - Non-Cardiovascular (Infection; Includes Sepsis)</i> |
| #438 | 24229 | PLA | Reported term: Cardiac arrest<br>Coded term: Death<br>Adjudication: Cardiovascular Death<br>Adjudicated cause of death: Death - Cardiovascular (Due To Heart Failure) | The narrative contained no evidence to support the FOURIER Clinical Events Committee's adjudicated cause of death.                                                                                                    | <i>Death Undetermined</i><br><br>Additional information requested. | <i>Death Undetermined</i>                                      |
| #439 | 24230 | EVO | Reported term: Myocardial infarction<br>Coded term: Myocardial infarction<br>Adjudication: Cardiovascular Death                                                       | The narratives read <i>on Day 792 the subject experienced myocardial infarction (Grade</i>                                                                                                                            |                                                                    | <i>Death - Cardiovascular (Due To An Acute MI)</i>             |

|      |       |     |                                                                                                                                                                                            |                                                                                                                           |                                                                    |                                                                                         |
|------|-------|-----|--------------------------------------------------------------------------------------------------------------------------------------------------------------------------------------------|---------------------------------------------------------------------------------------------------------------------------|--------------------------------------------------------------------|-----------------------------------------------------------------------------------------|
|      |       |     | Adjudicated cause of death: Death - Cardiovascular (Due To Stroke)                                                                                                                         | <i>4) with an outcome of fatal.</i>                                                                                       |                                                                    |                                                                                         |
| #446 | 24237 | EVO | Reported term: Pulmonary embolism<br>Coded term: Pulmonary embolism<br>Adjudication: Cardiovascular Death<br>Adjudicated cause of death: Death - Cardiovascular (Sudden Cardiac)           | The narratives read <i>on Day 489 the subject experienced pulmonary embolism (Grade 4) with an outcome of fatal.</i>      |                                                                    | <i>Death - Cardiovascular (Due To Other Cardiovascular Causes) (Pulmonary Embolism)</i> |
| #447 | 24238 | EVO | Reported term: Aortic aneurysm rupture<br>Coded term: Aortic aneurysm rupture<br>Adjudication: Cardiovascular Death<br>Adjudicated cause of death: Death - Cardiovascular (Sudden Cardiac) | The narratives read <i>on Day 452 the subject experienced aortic aneurysm rupture (Grade 4) with an outcome of fatal.</i> |                                                                    | <i>Death - Cardiovascular (Due To Cardiovascular Hemorrhage; aneurysm rupture)</i>      |
| #450 | 24241 | EVO | Reported term: Death<br>Coded term: Death<br>Adjudication: Non-Cardiovascular Death<br>Adjudicated cause of death: Death - Cardiovascular (Due To Heart Failure)                           | The narratives read <i>on Day 186 the subject experienced pneumonia (Grade 4) and on Day 194 the subject died.</i>        |                                                                    | <i>Death - Non-Cardiovascular (Infection; Includes Sepsis)</i>                          |
| #451 | 24242 | PLA | Reported term: Death<br>Coded term: Death<br>Adjudication: Undetermined Death<br>Adjudicated cause of death: Death - Cardiovascular (Sudden Cardiac)                                       | The narrative contained no evidence to support the FOURIER Clinical Events Committee's adjudicated cause of death.        | <i>Death Undetermined</i><br><br>Additional information requested. | <i>Death Undetermined</i>                                                               |
| #452 | 24243 | EVO | Reported term: Ventricular arrhythmia<br>Coded term: Ventricular arrhythmia<br>Adjudication: Undetermined Death<br>Adjudicated cause of death: Death - Undetermined                        | The narratives read <i>on Day 701 the subject experienced ventricular arrhythmia (Grade 4) with an outcome of fatal.</i>  |                                                                    | <i>Death - Cardiovascular (Sudden Cardiac)</i>                                          |
| #455 | 24247 | PLA | Reported term: Adenocarcinoma gastric<br>Coded term: Adenocarcinoma gastric<br>Adjudication: Non-Cardiovascular Death                                                                      | The narratives read <i>on Day 477 the subject experienced lung carcinoma cell type unspecified stage iv [cancer</i>       |                                                                    | <i>Death - Non-Cardiovascular (Malignancy)</i>                                          |

|      |       |     |                                                                                                                                                                                                                           |                                                                                                                                    |                                                                    |                                                                         |
|------|-------|-----|---------------------------------------------------------------------------------------------------------------------------------------------------------------------------------------------------------------------------|------------------------------------------------------------------------------------------------------------------------------------|--------------------------------------------------------------------|-------------------------------------------------------------------------|
|      |       |     | Adjudicated cause of death: <i>Death - Cardiovascular (Due To An Acute MI)</i>                                                                                                                                            | <i>of lung cell type unspecified stage iv] (Grade 4) with an outcome of fatal.</i>                                                 |                                                                    |                                                                         |
| #456 | 24248 | PLA | Reported term: Pulmonary embolism<br>Coded term: Pulmonary embolism<br>Adjudication: Cardiovascular Death<br>Adjudicated cause of death: <i>Death - Cardiovascular (Sudden Cardiac)</i>                                   | The narratives read <i>on Day 569 the subject experienced pulmonary embolism (Grade 4) with an outcome of fatal.</i>               |                                                                    | <i>Death - Cardiovascular (Due To Other Cardiovascular Causes) (PE)</i> |
| #458 | 24250 | PLA | Reported term: Death<br>Coded term: Death<br>Adjudication: Undetermined Death<br>Adjudicated cause of death: <i>Death - Cardiovascular (Sudden Cardiac)</i>                                                               | The narrative contained no evidence to support the FOURIER Clinical Events Committee's adjudicated cause of death.                 | <i>Death Undetermined</i><br><br>Additional information requested. | <i>Death Undetermined</i>                                               |
| #460 | 24252 | PLA | Reported term: Acute respiratory failure<br>Coded term: Acute respiratory failure<br>Adjudication: Non-Cardiovascular Death<br>Adjudicated cause of death: <i>Death - Non-Cardiovascular (Infection; Includes Sepsis)</i> | The narratives read <i>on Day 96 the subject experienced acute respiratory failure (Grade 4) with an outcome of fatal.</i>         |                                                                    | <i>Death - Non-Cardiovascular (Pulmonary)</i>                           |
| #462 | 24254 | EVO | Reported term: Bladder adenocarcinoma recurrent<br>Coded term: Bladder adenocarcinoma recurrent<br>Adjudication: Undetermined Death<br>Adjudicated cause of death: <i>Death - Cardiovascular (Sudden Cardiac)</i>         | The narratives read <i>on Day 593 the subject experienced bladder adenocarcinoma recurrent (Grade 4) with an outcome of fatal.</i> |                                                                    | <i>Death - Non-Cardiovascular (Malignancy)</i>                          |
| #463 | 24255 | PLA | Reported term: Death<br>Coded term: Found dead (cause undetermined)<br>Adjudication: Undetermined Death<br>Adjudicated cause of death: <i>Death - Cardiovascular (Sudden Cardiac)</i>                                     | The narratives read <i>on Day 241 the subject experienced death [found dead (cause undetermined)] (Grade 4).</i>                   |                                                                    | <i>Death Undetermined</i>                                               |

|      |       |     |                                                                                                                                                                            |                                                                                                                                |                                                                    |                                                                |
|------|-------|-----|----------------------------------------------------------------------------------------------------------------------------------------------------------------------------|--------------------------------------------------------------------------------------------------------------------------------|--------------------------------------------------------------------|----------------------------------------------------------------|
| #464 | 24256 | PLA | Reported term: Cardiac arrest<br>Coded term: Cardiac arrest<br>Adjudication: Undetermined Death<br>Adjudicated cause of death: Death - Cardiovascular (Due To An Acute MI) | The narratives read <i>on Day 248 the subject experienced cardiac arrest (Grade 4) with an outcome of fatal.</i>               |                                                                    | <i>Death - Cardiovascular (Sudden Cardiac)</i>                 |
| #467 | 24259 | PLA | Reported term: Death<br>Coded term: Death<br>Adjudication: Undetermined Death<br>Adjudicated cause of death: Death - Cardiovascular (Sudden Cardiac)                       | The narrative contained no evidence to support the FOURIER Clinical Events Committee's adjudicated cause of death.             | <i>Death Undetermined</i><br><br>Additional information requested. | <i>Death Undetermined</i>                                      |
| #469 | 24261 | EVO | Reported term: Sudden death<br>Coded term: Sudden death<br>Adjudication: Undetermined Death<br>Adjudicated cause of death: Death - Cardiovascular (Sudden Cardiac)         | The narrative contained no evidence to support the FOURIER Clinical Events Committee's adjudicated cause of death.             | <i>Death Undetermined</i><br><br>Additional information requested. | <i>Death Undetermined</i>                                      |
| #473 | 24265 | EVO | Reported term: Pneumonia<br>Coded term: Bronchopneumonia<br>Adjudication: Non-Cardiovascular Death<br>Adjudicated cause of death: Death - Cardiovascular (Due To Stroke)   | The narratives read <i>on Day 724 the subject experienced pneumonia [bronchopneumonia] (Grade 4) with an outcome of fatal.</i> |                                                                    | <i>Death - Non-Cardiovascular (Infection; Includes Sepsis)</i> |
| #474 | 24266 | EVO | Reported term: Sudden death<br>Coded term: Sudden death<br>Adjudication: Undetermined Death<br>Adjudicated cause of death: Death - Cardiovascular (Sudden Cardiac)         | The narrative contained no evidence to support the FOURIER Clinical Events Committee's adjudicated cause of death.             | <i>Death Undetermined</i><br><br>Additional information requested. | <i>Death Undetermined</i>                                      |
| #476 | 24268 | EVO | Reported term: Sudden death<br>Coded term: Sudden death<br>Adjudication: Undetermined Death<br>Adjudicated cause of death: Death - Cardiovascular (Sudden Cardiac)         | The narrative contained no evidence to support the FOURIER Clinical Events Committee's adjudicated cause of death.             | <i>Death Undetermined</i><br><br>Additional information requested. | <i>Death Undetermined</i>                                      |



|      |       |     |                                                                                                                                                                              |                                                                                                                                                                                                    |                                                                    |                                                                         |
|------|-------|-----|------------------------------------------------------------------------------------------------------------------------------------------------------------------------------|----------------------------------------------------------------------------------------------------------------------------------------------------------------------------------------------------|--------------------------------------------------------------------|-------------------------------------------------------------------------|
| #480 | 24273 | EVO | Reported term: Death<br>Coded term: Death<br>Adjudication: Undetermined Death<br>Adjudicated cause of death: Death - Non-Cardiovascular (Infection; Includes Sepsis)         | The narrative contained no evidence to support the FOURIER Clinical Events Committee's adjudicated cause of death.                                                                                 | <i>Death Undetermined</i><br><br>Additional information requested. | <i>Death Undetermined</i>                                               |
| #482 | 24275 | EVO | Reported term: Death<br>Coded term: Death – cardiovascular<br>Adjudication: Non-Cardiovascular Death<br>Adjudicated cause of death: Death - Non-Cardiovascular (Suicide)     | The narrative contained no evidence to support the FOURIER Clinical Events Committee's adjudicated cause of death.                                                                                 | <i>Death Undetermined</i><br><br>Additional information requested. | <i>Death Undetermined</i>                                               |
| #484 | 24277 | EVO | Reported term: Cardiac failure<br>Coded term: Heart failure<br>Adjudication: Cardiovascular Death<br>Adjudicated cause of death: Death - Cardiovascular (Sudden Cardiac)     | The narratives read <i>on Day 193 the subject experienced cardiac failure chronic [heart failure nyha class iii] (Grade 3) and on Day 202 the subject died.</i>                                    |                                                                    | <i>Death - Cardiovascular (Due To Heart Failure)</i>                    |
| #488 | 24282 | EVO | Reported term: Cardiovascular disorder<br>Coded term: Death<br>Adjudication: Cardiovascular Death<br>Adjudicated cause of death: Death - Cardiovascular (Due To An Acute MI) | The narratives read <i>on Day 444 the subject experienced cardiac failure acute [acute heart failure] (Grade 4) and cardiovascular disorder [death - cardiovascular] with an outcome of fatal.</i> |                                                                    | <i>Death - Cardiovascular (Due To Heart Failure)</i>                    |
| #489 | 24283 | PLA | Reported term: Sudden death<br>Coded term: Sudden death<br>Adjudication: Cardiovascular Death<br>Adjudicated cause of death: Death - Cardiovascular (Sudden Cardiac)         | The narrative contained no evidence to support the FOURIER Clinical Events Committee's adjudicated cause of death.                                                                                 | <i>Death Undetermined</i><br><br>Additional information requested. | <i>Death Undetermined</i>                                               |
| #491 | 24286 | EVO | Reported term: Sudden cardiac death<br>Coded term: Sudden coronary death<br>Adjudication: Cardiovascular Death                                                               | The narratives read <i>on Day 357 the subject experienced sudden cardiac death</i>                                                                                                                 |                                                                    | <i>Death - Non-Cardiovascular (Amyotrophic lateral sclerosis) (ALS)</i> |

|      |       |     |                                                                                                                                                                                                |                                                                                                                                                                                                                     |                                                                |                                                                                      |
|------|-------|-----|------------------------------------------------------------------------------------------------------------------------------------------------------------------------------------------------|---------------------------------------------------------------------------------------------------------------------------------------------------------------------------------------------------------------------|----------------------------------------------------------------|--------------------------------------------------------------------------------------|
|      |       |     | Adjudicated cause of death: Death - Cardiovascular (Sudden Cardiac)                                                                                                                            | <i>[sudden coronary death] (Grade 4). On XXX the subject died due to ALS.</i>                                                                                                                                       |                                                                |                                                                                      |
| #495 | 24291 | EVO | Reported term: Coronary artery thrombosis<br>Coded term: Coronary thrombosis<br>Adjudication: Cardiovascular Death<br>Adjudicated cause of death: Death - Undetermined                         | The narratives read <i>on Day 263 the subject experienced coronary artery thrombosis [coronary thrombosis] (Grade 4) with an outcome of fatal.</i> (This meets the definition of MI in the FOURIER trial protocol). |                                                                | <i>Death - Cardiovascular (Due To An Acute MI)</i>                                   |
| #498 | 24294 | EVO | Reported term: Myocardial fibrosis<br>Coded term: Postinfarction cardiosclerosis<br>Adjudication: Undetermined Death<br>Adjudicated cause of death: Death - Cardiovascular (Sudden Cardiac)    | The narratives read <i>on Day 329 the subject experienced myocardial fibrosis [postinfarction cardiosclerosis] (Grade 4) with an outcome of fatal.</i>                                                              |                                                                | <i>Death - Cardiovascular (Due To Other Causes) (Postinfarction cardiosclerosis)</i> |
| #501 | 24297 | EVO | Reported term: Death<br>Coded term: Death unexplained<br>Adjudication: Undetermined Death<br>Adjudicated cause of death: Death - Cardiovascular (Sudden Cardiac)                               | The narratives read <i>on Day 143 the subject experienced death [death unexplained] (Grade 4).</i>                                                                                                                  |                                                                | <i>Death Undetermined</i>                                                            |
| #503 | 24299 | EVO | Reported term: Carbon monoxide poisoning<br>Coded term: Carbon monoxide poisoning<br>Adjudication: Non-Cardiovascular Death<br>Adjudicated cause of death: Death - Non-Cardiovascular (Trauma) | The narratives read <i>on Day 797 the subject experienced carbon monoxide poisoning with an outcome of fatal.</i>                                                                                                   |                                                                | <i>Death – Non-Cardiovascular (Due To Poisoning)</i>                                 |
| #504 | 24300 | PLA | Reported term: Sudden death<br>Coded term: Sudden death<br>Adjudication: Non-Cardiovascular Death                                                                                              | The narrative contained no evidence to support the FOURIER Clinical Events                                                                                                                                          | <i>Death Undetermined</i><br>Additional information requested. | <i>Death Undetermined</i>                                                            |

|      |       |     |                                                                                                                                                                              |                                                                                                                      |                                                                |                           |
|------|-------|-----|------------------------------------------------------------------------------------------------------------------------------------------------------------------------------|----------------------------------------------------------------------------------------------------------------------|----------------------------------------------------------------|---------------------------|
|      |       |     | Adjudicated cause of death: Death - Non-Cardiovascular (Malignancy)                                                                                                          | Committee's adjudicated cause of death.                                                                              |                                                                |                           |
| #505 | 24301 | EVO | Reported term: Death<br>Coded term: Death<br>Adjudication: Non-Cardiovascular Death<br>Adjudicated cause of death: Death - Non-Cardiovascular (Malignancy)                   | The narrative contained no evidence to support the FOURIER Clinical Events Committee's adjudicated cause of death.   | <i>Death Undetermined</i><br>Additional information requested. | <i>Death Undetermined</i> |
| #508 | 24304 | PLA | Reported term: Cardiac death<br>Coded term: Cardiac death<br>Adjudication: Cardiovascular Death<br>Adjudicated cause of death: Death - Cardiovascular (Due To Heart Failure) | The narratives read <i>on Day 1083 the subject experienced cardiac death (Grade 4). [Unspecified cause of death]</i> | <i>Death Undetermined</i><br>Additional information requested. | <i>Death Undetermined</i> |
| #510 | 24306 | EVO | Reported term: Death<br>Coded term: Death<br>Adjudication: Undetermined Death<br>Adjudicated cause of death: Death - Non-Cardiovascular (Trauma)                             | The narrative contained no evidence to support the FOURIER Clinical Events Committee's adjudicated cause of death.   | <i>Death Undetermined</i><br>Additional information requested. | <i>Death Undetermined</i> |
| #511 | 24307 | EVO | Reported term: Sudden death<br>Coded term: Sudden death<br>Adjudication: Cardiovascular Death<br>Adjudicated cause of death: Death - Cardiovascular (Sudden Cardiac)         | The narrative contained no evidence to support the FOURIER Clinical Events Committee's adjudicated cause of death.   | <i>Death Undetermined</i><br>Additional information requested. | <i>Death Undetermined</i> |
| #514 | 24310 | EVO | Reported term: Sudden death<br>Coded term: Sudden death<br>Adjudication: Cardiovascular Death<br>Adjudicated cause of death: Death - Cardiovascular (Sudden Cardiac)         | The narrative contained no evidence to support the FOURIER Clinical Events Committee's adjudicated cause of death.   | <i>Death Undetermined</i><br>Additional information requested. | <i>Death Undetermined</i> |
| #516 | 24312 | EVO | Reported term: Sudden death<br>Coded term: Sudden death<br>Adjudication: Undetermined Death                                                                                  | The narrative contained no evidence to support the FOURIER Clinical Events                                           | <i>Death Undetermined</i><br>Additional information requested. | <i>Death Undetermined</i> |

|      |       |     |                                                                                                                                                                                      |                                                                                                                                               |                                                                    |                                                                |
|------|-------|-----|--------------------------------------------------------------------------------------------------------------------------------------------------------------------------------------|-----------------------------------------------------------------------------------------------------------------------------------------------|--------------------------------------------------------------------|----------------------------------------------------------------|
|      |       |     | Adjudicated cause of death: Death - Cardiovascular (Sudden Cardiac)                                                                                                                  | Committee's adjudicated cause of death.                                                                                                       |                                                                    |                                                                |
| #518 | 24314 | PLA | Reported term: Death<br>Coded term: Death<br>Adjudication: Cardiovascular Death<br>Adjudicated cause of death: Death - Cardiovascular (Due To An Acute MI)                           | The narratives read <i>on Day 376 the subject experienced sepsis and died on day 390.</i>                                                     |                                                                    | <i>Death - Non-Cardiovascular (Infection; Includes Sepsis)</i> |
| #521 | 24319 | EVO | Reported term: Sudden death<br>Coded term: Sudden death<br>Adjudication: Cardiovascular Death<br>Adjudicated cause of death: Death - Cardiovascular (Sudden Cardiac)                 | The narrative contained no evidence to support the FOURIER Clinical Events Committee's adjudicated cause of death.                            | <i>Death Undetermined</i><br><br>Additional information requested. | <i>Death Undetermined</i>                                      |
| #522 | 24320 | PLA | Reported term: Cardiac failure acute<br>Coded term: Acute heart failure<br>Adjudication: Cardiovascular Death<br>Adjudicated cause of death: Death - Cardiovascular (Sudden Cardiac) | The narratives read <i>on Day 667 the subject experienced cardiac failure acute [acute heart failure] (Grade 4) with an outcome of fatal.</i> |                                                                    | <i>Death - Cardiovascular (Due To Heart Failure)</i>           |
| #523 | 24321 | PLA | Reported term: Gastric cancer<br>Coded term: Stomach cancer<br>Adjudication: Non-Cardiovascular Death<br>Adjudicated cause of death: Death - Cardiovascular (Sudden Cardiac)         | The narratives read <i>on Day 481 the subject experienced gastric cancer [stomach cancer] (Grade 4) with an outcome of fatal.</i>             |                                                                    | <i>Death - Non-Cardiovascular (Malignancy)</i>                 |
| #525 | 24323 | EVO | Reported term: Sudden death<br>Coded term: Sudden death<br>Adjudication: Cardiovascular Death<br>Adjudicated cause of death: Death - Cardiovascular (Sudden Cardiac)                 | The narrative contained no evidence to support the FOURIER Clinical Events Committee's adjudicated cause of death.                            | <i>Death Undetermined</i><br><br>Additional information requested. | <i>Death Undetermined</i>                                      |
| #526 | 24324 | PLA | Reported term: Sudden death<br>Coded term: Sudden death<br>Adjudication: Cardiovascular Death                                                                                        | The narrative contained no evidence to support the FOURIER Clinical Events                                                                    | <i>Death Undetermined</i><br><br>Additional information requested. | <i>Death Undetermined</i>                                      |

|      |       |     |                                                                                                                                                                                      |                                                                                                                                               |                                                                    |                                                      |
|------|-------|-----|--------------------------------------------------------------------------------------------------------------------------------------------------------------------------------------|-----------------------------------------------------------------------------------------------------------------------------------------------|--------------------------------------------------------------------|------------------------------------------------------|
|      |       |     | Adjudicated cause of death: Death - Cardiovascular (Sudden Cardiac)                                                                                                                  | Committee's adjudicated cause of death.                                                                                                       |                                                                    |                                                      |
| #527 | 24325 | PLA | Reported term: Cardiac failure acute<br>Coded term: Acute heart failure<br>Adjudication: Cardiovascular Death<br>Adjudicated cause of death: Death - Cardiovascular (Sudden Cardiac) | The narratives read <i>on Day 461 the subject experienced cardiac failure acute [acute heart failure] (Grade 4) with an outcome of fatal.</i> |                                                                    | <i>Death - Cardiovascular (Due To Heart Failure)</i> |
| #530 | 24328 | EVO | Reported term: Cardiac death<br>Coded term: Cardiac death<br>Adjudication: Cardiovascular Death<br>Adjudicated cause of death: Death - Cardiovascular (Due To Heart Failure)         | The narratives read <i>on Day 593 the subject experienced cardiac death (Grade 4). [Unspecified cause of death]</i>                           | <i>Death Undetermined</i><br><br>Additional information requested. | <i>Death Undetermined</i>                            |
| #533 | 24331 | EVO | Reported term: Death<br>Coded term: Death<br>Adjudication: Undetermined Death<br>Adjudicated cause of death: Death - Cardiovascular (Due To An Acute MI)                             | The narrative contained no evidence to support the FOURIER Clinical Events Committee's adjudicated cause of death.                            | <i>Death Undetermined</i><br><br>Additional information requested. | <i>Death Undetermined</i>                            |
| #534 | 24332 | EVO | Reported term: Death<br>Coded term: Death<br>Adjudication: Cardiovascular Death<br>Adjudicated cause of death: Death - Cardiovascular (Sudden Cardiac)                               | The narrative contained no evidence to support the FOURIER Clinical Events Committee's adjudicated cause of death.                            | <i>Death Undetermined</i><br><br>Additional information requested. | <i>Death Undetermined</i>                            |
| #535 | 24333 | EVO | Reported term: Sudden death<br>Coded term: Sudden death, cause unknown<br>Adjudication: Undetermined Death<br>Adjudicated cause of death: Death - Cardiovascular (Sudden Cardiac)    | The narratives read <i>on Day 119 the subject experienced sudden death [sudden death, cause unknown] (Grade 4).</i>                           |                                                                    | <i>Death Undetermined</i>                            |
| #538 | 24337 | EVO | Reported term: Sudden death<br>Coded term: Sudden death, cause unknown<br>Adjudication: Undetermined Death                                                                           | The narratives read <i>on Day 260 the subject experienced sudden death [sudden death, cause unknown] (Grade 4).</i>                           |                                                                    | <i>Death Undetermined</i>                            |

|      |       |     |                                                                                                                                                                                            |                                                                                                                                                                 |                                                                                          |                                                                               |
|------|-------|-----|--------------------------------------------------------------------------------------------------------------------------------------------------------------------------------------------|-----------------------------------------------------------------------------------------------------------------------------------------------------------------|------------------------------------------------------------------------------------------|-------------------------------------------------------------------------------|
|      |       |     | Adjudicated cause of death: Death - Cardiovascular (Sudden Cardiac)                                                                                                                        |                                                                                                                                                                 |                                                                                          |                                                                               |
| #540 | 24340 | EVO | Reported term: Acute coronary syndrome<br>Coded term: Acute coronary syndrome<br>Adjudication: Cardiovascular Death<br>Adjudicated cause of death: Death - Cardiovascular (Sudden Cardiac) | The narratives read on Day 345 the subject experienced acute coronary syndrome (Grade 4) with an outcome of fatal.                                              |                                                                                          | <i>Death - Cardiovascular (Due To Other Causes) (acute coronary syndrome)</i> |
| #541 | 24341 | EVO | Reported term: Myocardial ischaemia<br>Coded term: Ischaemic heart disease<br>Adjudication: Cardiovascular Death<br>Adjudicated cause of death: Death - Cardiovascular (Sudden Cardiac)    | The narratives read on Day 123 the subject experienced myocardial ischaemia [ischaemic heart disease] (Grade 4) with an outcome of fatal.                       | <i>Death - Cardiovascular (Due To Other Causes)</i><br>Additional information requested. | <i>Death - Cardiovascular (Due To Other Causes) (ischaemic heart disease)</i> |
| #542 | 24342 | PLA | Reported term: Death<br>Coded term: Death<br>Adjudication: Cardiovascular Death<br>Adjudicated cause of death: Death - Cardiovascular (Sudden Cardiac)                                     | The narrative contained no evidence to support the FOURIER Clinical Events Committee's adjudicated cause of death.                                              | <i>Death Undetermined</i><br>Additional information requested.                           | <i>Death Undetermined</i>                                                     |
| #543 | 24343 | PLA | Reported term: Death<br>Coded term: Death<br>Adjudication: Undetermined Death<br>Adjudicated cause of death: Death - Cardiovascular (Sudden Cardiac)                                       | The narrative contained no evidence to support the FOURIER Clinical Events Committee's adjudicated cause of death.                                              | <i>Death Undetermined</i><br>Additional information requested.                           | <i>Death Undetermined</i>                                                     |
| #544 | 24344 | EVO | Reported term: Death<br>Coded term: Death<br>Adjudication: Cardiovascular Death<br>Adjudicated cause of death: Death - Cardiovascular (Due To Stroke)                                      | <i>The narratives read on Day 509 the subject experienced cardiac failure chronic [heart failure nyha class iii] (Grade 4) and on Day 513 the subject died.</i> |                                                                                          | <i>Death - Cardiovascular (Due To Heart Failure)</i>                          |
| #545 | 24345 | PLA | Reported term: Death<br>Coded term: Death non cardiovascular                                                                                                                               | The narratives read on Day 444 the subject experienced                                                                                                          |                                                                                          | <i>Death – Non Cardiovascular</i>                                             |

|      |       |     |                                                                                                                                                                                          |                                                                                                                     |                                                                    |                                                                |
|------|-------|-----|------------------------------------------------------------------------------------------------------------------------------------------------------------------------------------------|---------------------------------------------------------------------------------------------------------------------|--------------------------------------------------------------------|----------------------------------------------------------------|
|      |       |     | Adjudication: Non-Cardiovascular Death<br>Adjudicated cause of death: Death - Non-Cardiovascular (Malignancy)                                                                            | <i>death [death non cardiovascular] (Grade 4).</i>                                                                  |                                                                    |                                                                |
| #547 | 24348 | PLA | Reported term: Death<br>Coded term: Death<br>Adjudication: Undetermined Death<br>Adjudicated cause of death: Death - Cardiovascular (Sudden Cardiac)                                     | The narrative contained no evidence to support the FOURIER Clinical Events Committee's adjudicated cause of death.  | <i>Death Undetermined</i><br><br>Additional information requested. | <i>Death Undetermined</i>                                      |
| #549 | 24351 | PLA | Reported term: Sudden death<br>Coded term: Sudden death, cause unknown<br>Adjudication: Cardiovascular Death<br>Adjudicated cause of death: Death - Cardiovascular (Sudden Cardiac)      | The narratives read <i>on Day 563 the subject experienced sudden death [sudden death, cause unknown] (Grade 4).</i> |                                                                    | <i>Death Undetermined</i>                                      |
| #551 | 24354 | EVO | Reported term: Death<br>Coded term: Death<br>Adjudication: Cardiovascular Death<br>Adjudicated cause of death: Death - Cardiovascular (Due To Heart Failure)                             | The narrative contained no evidence to support the FOURIER Clinical Events Committee's adjudicated cause of death.  | <i>Death Undetermined</i><br><br>Additional information requested. | <i>Death Undetermined</i>                                      |
| #553 | 24356 | EVO | Reported term: Death<br>Coded term: Death<br>Adjudication: Cardiovascular Death<br>Adjudicated cause of death: Death - Cardiovascular (Due To Heart Failure)                             | The narrative contained no evidence to support the FOURIER Clinical Events Committee's adjudicated cause of death.  | <i>Death Undetermined</i><br><br>Additional information requested. | <i>Death Undetermined</i>                                      |
| #554 | 24357 | PLA | Reported term: Cardiopulmonary failure<br>Coded term: Cardiopulmonary failure<br>Adjudication: Undetermined Death<br>Adjudicated cause of death: Death - Cardiovascular (Sudden Cardiac) | The narrative contained no evidence to support the FOURIER Clinical Events Committee's adjudicated cause of death.  | <i>Death Undetermined</i><br><br>Additional information requested. | <i>Death Undetermined</i>                                      |
| #555 | 24358 | EVO | Reported term: Sepsis<br>Coded term: Sepsis<br>Adjudication: Non-Cardiovascular Death                                                                                                    | The narratives read <i>on Day 123 the subject experienced</i>                                                       | <i>Death - Non-Cardiovascular</i>                                  | <i>Death - Non-Cardiovascular (Infection; Includes Sepsis)</i> |

|      |       |     |                                                                                                                                                                                                  |                                                                                                                                                        |                                                                              |                                                                |
|------|-------|-----|--------------------------------------------------------------------------------------------------------------------------------------------------------------------------------------------------|--------------------------------------------------------------------------------------------------------------------------------------------------------|------------------------------------------------------------------------------|----------------------------------------------------------------|
|      |       |     | Adjudicated cause of death: Death - Non-Cardiovascular (Malignancy)                                                                                                                              | <i>sepsis (Grade 4) with an outcome of fatal.</i>                                                                                                      | <i>(Infection; Includes Sepsis)</i><br><br>Additional information requested. |                                                                |
| #556 | 24359 | PLA | Reported term: Cardiopulmonary failure<br>Coded term: Cardiopulmonary failure<br>Adjudication: Cardiovascular Death<br>Adjudicated cause of death: Death - Cardiovascular (Due To Heart Failure) | The narrative contained no evidence to support the FOURIER Clinical Events Committee's adjudicated cause of death.                                     | <i>Death Undetermined</i><br><br>Additional information requested.           | <i>Death Undetermined</i>                                      |
| #557 | 24361 | EVO | Reported term: Death<br>Coded term: Death<br>Adjudication: Non-Cardiovascular Death<br>Adjudicated cause of death: Death - Non-Cardiovascular (Pulmonary)                                        | The narratives read <i>on Day 460 the subject experienced pneumonia [bronchopneumonia] (Grade 4) and on Day 462 the subject died due to the event.</i> |                                                                              | <i>Death - Non-Cardiovascular (Infection; Includes Sepsis)</i> |
| #558 | 24362 | EVO | Reported term: Death<br>Coded term: Death<br>Adjudication: Cardiovascular Death<br>Adjudicated cause of death: Death - Cardiovascular (Due To Stroke)                                            | The narrative contained no evidence to support the FOURIER Clinical Events Committee's adjudicated cause of death.                                     | <i>Death Undetermined</i><br><br>Additional information requested.           | <i>Death Undetermined</i>                                      |
| #559 | 24363 | EVO | Reported term: Death<br>Coded term: Death<br>Adjudication: Cardiovascular Death<br>Adjudicated cause of death: Death - Cardiovascular (Due To Heart Failure)                                     | The narrative contained no evidence to support the FOURIER Clinical Events Committee's adjudicated cause of death.                                     | <i>Death Undetermined</i><br><br>Additional information requested.           | <i>Death Undetermined</i>                                      |
| #561 | 24365 | EVO | Reported term: Death<br>Coded term: Death NOS<br>Adjudication: Cardiovascular Death                                                                                                              | The narratives read <i>on Day 109 the subject experienced pneumonia [bronchopneumonia] (Grade</i>                                                      |                                                                              | <i>Death - Non-Cardiovascular (Infection; Includes Sepsis)</i> |



|      |       |     |                                                                                                                                                                                                               |                                                                                                                                                                                       |                                                                  |                                                      |
|------|-------|-----|---------------------------------------------------------------------------------------------------------------------------------------------------------------------------------------------------------------|---------------------------------------------------------------------------------------------------------------------------------------------------------------------------------------|------------------------------------------------------------------|------------------------------------------------------|
|      |       |     | Adjudicated cause of death: Death - Cardiovascular (Due To An Acute MI)                                                                                                                                       | <i>4) and on Day 132 the subject died due to the event.</i>                                                                                                                           |                                                                  |                                                      |
| #565 | 24370 | EVO | Reported term: Atrial fibrillation<br>Coded term: Atrial fibrillation aggravated<br>Adjudication: Cardiovascular Death<br>Adjudicated cause of death: Death - Non-Cardiovascular (Infection; Includes Sepsis) | The narratives read <i>on Day 559 the subject experienced atrial fibrillation [atrial fibrillation aggravated] (Grade 4) with an outcome of fatal.</i>                                | <i>Death – Undetermined</i><br>Additional information requested. | <i>Death Undetermined</i>                            |
| #566 | 24371 | PLA | Reported term: Sudden death<br>Coded term: Sudden death<br>Adjudication: Cardiovascular Death<br>Adjudicated cause of death: Death - Cardiovascular (Sudden Cardiac)                                          | The narrative contained no evidence to support the FOURIER Clinical Events Committee’s adjudicated cause of death.                                                                    | <i>Death Undetermined</i><br>Additional information requested.   | <i>Death Undetermined</i>                            |
| #569 | 24374 | EVO | Reported term: Pulmonary oedema<br>Coded term: Pulmonary oedema<br>Adjudication: Non-Cardiovascular Death<br>Adjudicated cause of death: Death - Cardiovascular (Sudden Cardiac)                              | The narratives read <i>on Day 469 the subject experienced cardiac failure [heart failure event - urgent visit] (Grade 4) and pulmonary oedema (Grade 4) with an outcome of fatal.</i> |                                                                  | <i>Death - Cardiovascular (Due To Heart Failure)</i> |
| #570 | 24376 | PLA | Reported term: Death<br>Coded term: Death<br>Adjudication: Undetermined Death<br>Adjudicated cause of death: Death - Cardiovascular (Sudden Cardiac)                                                          | The narrative contained no evidence to support the FOURIER Clinical Events Committee’s adjudicated cause of death.                                                                    | <i>Death Undetermined</i><br>Additional information requested.   | <i>Death Undetermined</i>                            |
| #571 | 24377 | PLA | Reported term: Death<br>Coded term: Death<br>Adjudication: Undetermined Death                                                                                                                                 | The narrative contained no evidence to support the FOURIER Clinical Events                                                                                                            | <i>Death Undetermined</i><br>Additional information requested.   | <i>Death Undetermined</i>                            |

|      |       |     |                                                                                                                                                                          |                                                                                                                    |                                                                    |                           |
|------|-------|-----|--------------------------------------------------------------------------------------------------------------------------------------------------------------------------|--------------------------------------------------------------------------------------------------------------------|--------------------------------------------------------------------|---------------------------|
|      |       |     | Adjudicated cause of death: Death - Cardiovascular (Sudden Cardiac)                                                                                                      | Committee's adjudicated cause of death.                                                                            |                                                                    |                           |
| #573 | 24379 | PLA | Reported term: Death<br>Coded term: Death<br>Adjudication: Non-Cardiovascular Death<br>Adjudicated cause of death: Death - Cardiovascular (Due To Stroke)                | The narrative contained no evidence to support the FOURIER Clinical Events Committee's adjudicated cause of death. | <i>Death Undetermined</i><br><br>Additional information requested. | <i>Death Undetermined</i> |
| #574 | 24380 | EVO | Reported term: Death<br>Coded term: Death<br>Adjudication: Undetermined Death<br>Adjudicated cause of death: Death - Cardiovascular (Sudden Cardiac)                     | The narrative contained no evidence to support the FOURIER Clinical Events Committee's adjudicated cause of death. | <i>Death Undetermined</i><br><br>Additional information requested. | <i>Death Undetermined</i> |
| #577 | 24383 | PLA | Reported term: Death<br>Coded term: Death from natural causes<br>Adjudication: Undetermined Death<br>Adjudicated cause of death: Death - Cardiovascular (Sudden Cardiac) | The narrative contained no evidence to support the FOURIER Clinical Events Committee's adjudicated cause of death. |                                                                    | <i>Death Undetermined</i> |
| #578 | 24384 | PLA | Reported term: Sudden death<br>Coded term: Death sudden<br>Adjudication: Undetermined Death<br>Adjudicated cause of death: Death - Cardiovascular (Sudden Cardiac)       | The narrative contained no evidence to support the FOURIER Clinical Events Committee's adjudicated cause of death. | <i>Death Undetermined</i><br><br>Additional information requested. | <i>Death Undetermined</i> |
| #580 | 24386 | PLA | Reported term: Sudden death<br>Coded term: Death sudden<br>Adjudication: Cardiovascular Death<br>Adjudicated cause of death: Death - Cardiovascular (Sudden Cardiac)     | The narrative contained no evidence to support the FOURIER Clinical Events Committee's adjudicated cause of death. | <i>Death Undetermined</i><br><br>Additional information requested. | <i>Death Undetermined</i> |
| #583 | 24389 | EVO | Reported term: Death<br>Coded term: Death                                                                                                                                | The narrative contained no evidence to support the                                                                 | <i>Death Undetermined</i>                                          | <i>Death Undetermined</i> |

|      |       |     |                                                                                                                                                                                |                                                                                                                                                                                  |                                                                |                                                                                |
|------|-------|-----|--------------------------------------------------------------------------------------------------------------------------------------------------------------------------------|----------------------------------------------------------------------------------------------------------------------------------------------------------------------------------|----------------------------------------------------------------|--------------------------------------------------------------------------------|
|      |       |     | Adjudication: Cardiovascular Death<br>Adjudicated cause of death: Death - Cardiovascular (Due To Heart Failure)                                                                | FOURIER Clinical Events Committee's adjudicated cause of death.                                                                                                                  | Additional information requested.                              |                                                                                |
| #584 | 24390 | EVO | Reported term: Death<br>Coded term: Found dead (cause undetermined)<br>Adjudication: Undetermined Death<br>Adjudicated cause of death: Death - Cardiovascular (Sudden Cardiac) | The narratives read <i>on Day 395 the subject experienced death [found dead (cause undetermined)]</i> .                                                                          |                                                                | <i>Death Undetermined</i>                                                      |
| #585 | 24391 | PLA | Reported term: Death<br>Coded term: Unknown cause of death<br>Adjudication: Undetermined Death<br>Adjudicated cause of death: Death - Cardiovascular (Sudden Cardiac)          | The narratives read <i>on Day 643 the subject experienced death [unknown cause of death]</i> .                                                                                   |                                                                | <i>Death Undetermined</i>                                                      |
| #588 | 24394 | EVO | Reported term: Sudden death<br>Coded term: Sudden death<br>Adjudication: Cardiovascular Death<br>Adjudicated cause of death: Death - Cardiovascular (Sudden Cardiac)           | The narratives read <i>on Day 71 the subject was reported with myocardial infarction (Grade 4) and on Day 71 the subject experienced sudden death [death sudden] (Grade 4)</i> . |                                                                | <i>Death - Cardiovascular (Due To An Acute MI)</i>                             |
| #589 | 24395 | EVO | Reported term: Ulcer haemorrhage<br>Coded term: Bleeding ulcer<br>Adjudication: Non-Cardiovascular Death<br>Adjudicated cause of death: Death - Undetermined                   | The narratives read <i>on Day 248 the subject experienced ulcer haemorrhage [bleeding ulcer] (Grade 4) with an outcome of fatal</i> .                                            |                                                                | <i>Death - Non-Cardiovascular (Non-Cardiovascular Hemorrhage; GI bleeding)</i> |
| #590 | 24397 | EVO | Reported term: Death<br>Coded term: Death<br>Adjudication: Undetermined Death<br>Adjudicated cause of death: Death - Non-Cardiovascular (Malignancy)                           | The narrative contained no evidence to support the FOURIER Clinical Events Committee's adjudicated cause of death.                                                               | <i>Death Undetermined</i><br>Additional information requested. | <i>Death Undetermined</i>                                                      |

|      |       |     |                                                                                                                                                                                               |                                                                                                                    |                                                                    |                                                                |
|------|-------|-----|-----------------------------------------------------------------------------------------------------------------------------------------------------------------------------------------------|--------------------------------------------------------------------------------------------------------------------|--------------------------------------------------------------------|----------------------------------------------------------------|
| #591 | 24398 | PLA | Reported term: Pneumonia<br>Coded term: Pneumonia<br>Adjudication: Non-Cardiovascular Death<br>Adjudicated cause of death: Death - Non-Cardiovascular (Pulmonary)                             | The narratives read <i>on Day 127 the subject experienced pneumonia (Grade 4) with an outcome of fatal.</i>        |                                                                    | <i>Death - Non-Cardiovascular (Infection; Includes Sepsis)</i> |
| #592 | 24399 | PLA | Reported term: Death<br>Coded term: Death<br>Adjudication: Cardiovascular Death<br>Adjudicated cause of death: Death - Cardiovascular (Sudden Cardiac)                                        | The narrative contained no evidence to support the FOURIER Clinical Events Committee's adjudicated cause of death. | <i>Death Undetermined</i><br><br>Additional information requested. | <i>Death Undetermined</i>                                      |
| #594 | 24401 | PLA | Reported term: Generalised tonic-clonic seizure<br>Coded term: Grand mal seizure<br>Adjudication: Cardiovascular Death<br>Adjudicated cause of death: Death - Cardiovascular (Sudden Cardiac) | The narrative contained no evidence to support the FOURIER Clinical Events Committee's adjudicated cause of death. | <i>Death Undetermined</i><br><br>Additional information requested. | <i>Death Undetermined</i>                                      |
| #602 | 24409 | EVO | Reported term: Sudden death<br>Coded term: Sudden death<br>Adjudication: Undetermined Death<br>Adjudicated cause of death: Death - Cardiovascular (Sudden Cardiac)                            | The narrative contained no evidence to support the FOURIER Clinical Events Committee's adjudicated cause of death. | <i>Death Undetermined</i><br><br>Additional information requested. | <i>Death Undetermined</i>                                      |
| #603 | 24410 | PLA | Reported term: Sudden death<br>Coded term: Sudden death, cause unknown<br>Adjudication: Undetermined Death<br>Adjudicated cause of death: Death - Cardiovascular (Sudden Cardiac)             | The narrative contained no evidence to support the FOURIER Clinical Events Committee's adjudicated cause of death. |                                                                    | <i>Death Undetermined</i>                                      |
| #604 | 24411 | EVO | Reported term: Death<br>Coded term: Death<br>Adjudication: Cardiovascular Death<br>Adjudicated cause of death: Death - Cardiovascular (Sudden Cardiac)                                        | The narrative contained no evidence to support the FOURIER Clinical Events Committee's adjudicated cause of death. | <i>Death Undetermined</i><br><br>Additional information requested. | <i>Death Undetermined</i>                                      |

|      |       |     |                                                                                                                                                                                                |                                                                                                                                                 |                                                                    |                                                                                       |
|------|-------|-----|------------------------------------------------------------------------------------------------------------------------------------------------------------------------------------------------|-------------------------------------------------------------------------------------------------------------------------------------------------|--------------------------------------------------------------------|---------------------------------------------------------------------------------------|
| #608 | 24416 | PLA | Reported term: Cardiac failure congestive<br>Coded term: Congestive cardiac failure<br>Adjudication: Undetermined Death<br>Adjudicated cause of death: Death - Cardiovascular (Sudden Cardiac) | The narratives read <i>on Day 224 the subject experienced cardiac failure congestive [congestive cardiac failure] with an outcome of fatal.</i> |                                                                    | <i>Death - Cardiovascular (Due To Heart Failure)</i>                                  |
| #609 | 24418 | PLA | Reported term: Pulmonary embolism<br>Coded term: Pulmonary embolus<br>Adjudication: Cardiovascular Death<br>Adjudicated cause of death: Death - Cardiovascular (Sudden Cardiac)                | The narratives read <i>on Day 582 the subject experienced pulmonary embolism [pulmonary embolus] (Grade 4) with an outcome of fatal.</i>        |                                                                    | <i>Death - Cardiovascular (Due To Other Cardiovascular Causes) (Pulmonary Emboli)</i> |
| #610 | 24419 | EVO | Reported term: Death<br>Coded term: Death<br>Adjudication: Undetermined Death<br>Adjudicated cause of death: Death - Cardiovascular (Sudden Cardiac)                                           | The narrative contained no evidence to support the FOURIER Clinical Events Committee's adjudicated cause of death.                              | <i>Death Undetermined</i><br><br>Additional information requested. | <i>Death Undetermined</i>                                                             |
| #617 | 24426 | PLA | Reported term: Pain in extremity<br>Coded term: Bilateral leg pain<br>Adjudication: Non-Cardiovascular Death<br>Adjudicated cause of death: Death - Cardiovascular (Sudden Cardiac)            | The narrative contained no evidence to support the FOURIER Clinical Events Committee's adjudicated cause of death.                              | <i>Death Undetermined</i><br><br>Additional information requested. | <i>Death Undetermined</i>                                                             |
| #624 | 24433 | EVO | Reported term: Myocardial infarction<br>Coded term: Heart attack<br>Adjudication: Cardiovascular Death<br>Adjudicated cause of death: Death - Cardiovascular (Sudden Cardiac)                  | The narratives read <i>on Day 560 the subject experienced myocardial infarction [heart attack] (Grade 4) with an outcome of fatal.</i>          |                                                                    | <i>Death - Cardiovascular (Due To An Acute MI)</i>                                    |
| #625 | 24434 | PLA | Reported term: Death<br>Coded term: Unknown cause of death<br>Adjudication: Undetermined Death<br>Adjudicated cause of death: Death - Cardiovascular (Sudden Cardiac)                          | The narratives read <i>on Day 543 the subject experienced death [unknown cause of death].</i>                                                   |                                                                    | <i>Death Undetermined</i>                                                             |

|      |       |     |                                                                                                                                                                                                     |                                                                                                                                              |                                                                    |                                                      |
|------|-------|-----|-----------------------------------------------------------------------------------------------------------------------------------------------------------------------------------------------------|----------------------------------------------------------------------------------------------------------------------------------------------|--------------------------------------------------------------------|------------------------------------------------------|
| #627 | 24436 | PLA | Reported term: Death<br>Coded term: Death<br>Adjudication: Non-Cardiovascular Death<br>Adjudicated cause of death: Death - Cardiovascular (Due To Other Cardiovascular Causes) (Pulmonary Embolism) | The narrative contained no evidence to support the FOURIER Clinical Events Committee's adjudicated cause of death.                           | <i>Death Undetermined</i><br><br>Additional information requested. | <i>Death Undetermined</i>                            |
| #628 | 24437 | EVO | Reported term: Acute myocardial infarction<br>Coded term: Acute myocardial infarction<br>Adjudication: Cardiovascular Death<br>Adjudicated cause of death: Death - Cardiovascular (Sudden Cardiac)  | The narratives read <i>on Day 2 the subject experienced acute myocardial infarction (Grade 4) with an outcome of fatal.</i>                  |                                                                    | <i>Death - Cardiovascular (Due To An Acute MI)</i>   |
| #630 | 24440 | PLA | Reported term: Cardiac failure<br>Coded term: Myocardial decompensation<br>Adjudication: Cardiovascular Death<br>Adjudicated cause of death: Death - Cardiovascular (Due To An Acute MI)            | The narratives read <i>on Day 37 the subject experienced cardiac failure [myocardial decompensation] (Grade 4) with an outcome of fatal.</i> |                                                                    | <i>Death - Cardiovascular (Due To Heart Failure)</i> |
| #634 | 24444 | EVO | Reported term: Death<br>Coded term: Death<br>Adjudication: Cardiovascular Death<br>Adjudicated cause of death: Death - Cardiovascular (Sudden Cardiac)                                              | The narrative contained no evidence to support the FOURIER Clinical Events Committee's adjudicated cause of death.                           | <i>Death Undetermined</i><br><br>Additional information requested. | <i>Death Undetermined</i>                            |
| #635 | 24445 | EVO | Reported term: Cardiac arrest<br>Coded term: Out of hospital cardiac arrest<br>Adjudication: Undetermined Death<br>Adjudicated cause of death: Death - Cardiovascular (Sudden Cardiac)              | The narrative contained no evidence to support the FOURIER Clinical Events Committee's adjudicated cause of death.                           | <i>Death Undetermined</i><br><br>Additional information requested. | <i>Death Undetermined</i>                            |
| #636 | 24447 | EVO | Reported term: Acute myocardial infarction<br>Coded term: Acute myocardial infarction<br>Adjudication: Cardiovascular Death                                                                         | The narratives read <i>on Day 616 the subject experienced acute myocardial infarction</i>                                                    |                                                                    | <i>Death - Cardiovascular (Due To An Acute MI)</i>   |

|      |       |     |                                                                                                                                                                                                    |                                                                                                                                                           |                                                                                             |                                                                |
|------|-------|-----|----------------------------------------------------------------------------------------------------------------------------------------------------------------------------------------------------|-----------------------------------------------------------------------------------------------------------------------------------------------------------|---------------------------------------------------------------------------------------------|----------------------------------------------------------------|
|      |       |     | Adjudicated cause of death: Death - Cardiovascular (Sudden Cardiac)                                                                                                                                | <i>(Grade 4) with an outcome of fatal.</i>                                                                                                                |                                                                                             |                                                                |
| #637 | 24448 | EVO | Reported term: Death<br>Coded term: Death<br>Adjudication: Cardiovascular Death<br>Adjudicated cause of death: Death - Cardiovascular (Due To Heart Failure)                                       | The narrative contained no evidence to support the FOURIER Clinical Events Committee's adjudicated cause of death.                                        | <i>Death Undetermined</i><br><br>Additional information requested.                          | <i>Death Undetermined</i>                                      |
| #639 | 24450 | EVO | Reported term: Acute myocardial infarction<br>Coded term: Acute myocardial infarction<br>Adjudication: Cardiovascular Death<br>Adjudicated cause of death: Death - Cardiovascular (Sudden Cardiac) | The narratives read <i>on Day 212 the subject experienced myocardial infarction [suspected myocardial infarction] (Grade 4) with an outcome of fatal.</i> | <i>Death - Cardiovascular (Due To An Acute MI)</i><br><br>Additional information requested. | <i>Death - Cardiovascular (Due To An Acute MI)</i>             |
| #641 | 24452 | EVO | Reported term: Myocardial infarction<br>Coded term: Myocardial infarction<br>Adjudication: Cardiovascular Death<br>Adjudicated cause of death: Death - Cardiovascular (Sudden Cardiac)             | The narratives read <i>on Day 211 the subject experienced myocardial infarction (Grade 4) with an outcome of fatal.</i>                                   |                                                                                             | <i>Death - Cardiovascular (Due To An Acute MI)</i>             |
| #642 | 24453 | EVO | Reported term: Cardiac arrest<br>Coded term: Cardiac arrest<br>Adjudication: Non-Cardiovascular Death<br>Adjudicated cause of death: Death - Non-Cardiovascular (Infection; Includes Sepsis)       | The narrative contained no evidence to support the FOURIER Clinical Events Committee's adjudicated cause of death.                                        | <i>Death Undetermined</i><br><br>Additional information requested.                          | <i>Death Undetermined</i>                                      |
| #643 | 24454 | PLA | Reported term: Cardiac arrest<br>Coded term: Cardiac arrest<br>Adjudication: Non-Cardiovascular Death<br>Adjudicated cause of death: Death - Cardiovascular (Due To Stroke)                        | The narratives read <i>on Day 504 the subject experienced sepsis and died on Day 509.</i>                                                                 |                                                                                             | <i>Death - Non-Cardiovascular (Infection; Includes Sepsis)</i> |
| #646 | 24457 | EVO | Reported term: Death<br>Coded term: Death from natural causes<br>Adjudication: Cardiovascular Death                                                                                                | The narratives read <i>on Day 227 the subject was reported with cardiac failure</i>                                                                       |                                                                                             | <i>Death - Cardiovascular (Due To Heart Failure)</i>           |

|      |       |     |                                                                                                                                                                                        |                                                                                                                    |                                                                    |                                                    |
|------|-------|-----|----------------------------------------------------------------------------------------------------------------------------------------------------------------------------------------|--------------------------------------------------------------------------------------------------------------------|--------------------------------------------------------------------|----------------------------------------------------|
|      |       |     | Adjudicated cause of death: Death - Cardiovascular (Due To Other Cardiovascular Causes) (Chronic Ischemic Heart Disease)                                                               | <i>[worsening heart failure] (Grade 4) and on (Day 227) the subject experienced death (Grade 4).</i>               |                                                                    |                                                    |
| #647 | 24458 | PLA | Reported term: Death<br>Coded term: Death<br>Adjudication: Cardiovascular Death<br>Adjudicated cause of death: Death - Cardiovascular (Due To An Acute MI)                             | The narrative contained no evidence to support the FOURIER Clinical Events Committee's adjudicated cause of death. | <i>Death Undetermined</i><br><br>Additional information requested. | <i>Death Undetermined</i>                          |
| #648 | 24459 | PLA | Reported term: Death<br>Coded term: Death<br>Adjudication: Non-Cardiovascular Death<br>Adjudicated cause of death: Death - Non-Cardiovascular (Other Non-Cardiovascular) (Drowning)    | The narrative contained no evidence to support the FOURIER Clinical Events Committee's adjudicated cause of death. | <i>Death Undetermined</i><br><br>Additional information requested. | <i>Death Undetermined</i>                          |
| #649 | 24460 | EVO | Reported term: Death<br>Coded term: Death<br>Adjudication: Cardiovascular Death<br>Adjudicated cause of death: Death - Cardiovascular (Sudden Cardiac)                                 | The narrative contained no evidence to support the FOURIER Clinical Events Committee's adjudicated cause of death. | <i>Death Undetermined</i><br><br>Additional information requested. | <i>Death Undetermined</i>                          |
| #650 | 24461 | EVO | Reported term: Myocardial infarction<br>Coded term: Myocardial infarction<br>Adjudication: Cardiovascular Death<br>Adjudicated cause of death: Death - Cardiovascular (Sudden Cardiac) | The narratives read <i>on Day 624 the subject experienced myocardial infarction with an outcome of fatal.</i>      |                                                                    | <i>Death - Cardiovascular (Due To An Acute MI)</i> |
| #652 | 24463 | EVO | Reported term: Death<br>Coded term: Death<br>Adjudication: Undetermined Death<br>Adjudicated cause of death: Death - Cardiovascular (Sudden Cardiac)                                   | The narrative contained no evidence to support the FOURIER Clinical Events Committee's adjudicated cause of death. | <i>Death Undetermined</i><br><br>Additional information requested. | <i>Death Undetermined</i>                          |



|      |       |     |                                                                                                                                                                                        |                                                                                                                                             |                                                                                             |                                                |
|------|-------|-----|----------------------------------------------------------------------------------------------------------------------------------------------------------------------------------------|---------------------------------------------------------------------------------------------------------------------------------------------|---------------------------------------------------------------------------------------------|------------------------------------------------|
| #654 | 24465 | EVO | Reported term: Sudden death<br>Coded term: Sudden death, cause unknown<br>Adjudication: Undetermined Death<br>Adjudicated cause of death: Death - Cardiovascular (Sudden Cardiac)      | The narratives read <i>on Day 164 the subject experienced sudden death [sudden death, cause unknown] (Grade 4).</i>                         |                                                                                             | <i>Death Undetermined</i>                      |
| #656 | 24468 | EVO | Reported term: Death<br>Coded term: Death<br>Adjudication: Non-Cardiovascular Death<br>Adjudicated cause of death: Death - Non-Cardiovascular (Infection; Includes Sepsis)             | The narratives read <i>on Day 336 the subject experienced metastases to thorax [right side metastatic hydrothorax] and died on day 394.</i> |                                                                                             | <i>Death - Non-Cardiovascular (Malignancy)</i> |
| #657 | 24469 | PLA | Reported term: Myocardial ischaemia<br>Coded term: Ischemic heart disease<br>Adjudication: Cardiovascular Death<br>Adjudicated cause of death: Death - Cardiovascular (Sudden Cardiac) | The narratives read <i>on day 505 the subject experienced chronic kidney disease [chronic kidney disease V stage] and died on day 516.</i>  | <i>Death Undetermined</i> (suspect kidney disease)<br><br>Additional information requested. | <i>Death Undetermined</i>                      |
| #658 | 24471 | PLA | Reported term: Death<br>Coded term: Death<br>Adjudication: Cardiovascular Death<br>Adjudicated cause of death: Death - Cardiovascular (Sudden Cardiac)                                 | The narrative contained no evidence to support the FOURIER Clinical Events Committee's adjudicated cause of death.                          | <i>Death Undetermined</i><br><br>Additional information requested.                          | <i>Death Undetermined</i>                      |
| #659 | 24472 | EVO | Reported term: Death<br>Coded term: Death<br>Adjudication: Cardiovascular Death<br>Adjudicated cause of death: Death - Cardiovascular (Sudden Cardiac)                                 | The narrative contained no evidence to support the FOURIER Clinical Events Committee's adjudicated cause of death.                          | <i>Death Undetermined</i><br><br>Additional information requested.                          | <i>Death Undetermined</i>                      |
| #660 | 24473 | EVO | Reported term: Death<br>Coded term: Death<br>Adjudication: Cardiovascular Death<br>Adjudicated cause of death: Death - Cardiovascular (Sudden Cardiac)                                 | The narrative contained no evidence to support the FOURIER Clinical Events Committee's adjudicated cause of death.                          | <i>Death Undetermined</i><br><br>Additional information requested.                          | <i>Death Undetermined</i>                      |

|      |       |     |                                                                                                                                                                                                                |                                                                                                                                                                         |                                                                |                                                      |
|------|-------|-----|----------------------------------------------------------------------------------------------------------------------------------------------------------------------------------------------------------------|-------------------------------------------------------------------------------------------------------------------------------------------------------------------------|----------------------------------------------------------------|------------------------------------------------------|
| #661 | 24474 | EVO | Reported term: Cardiac failure acute<br>Coded term: Acute coronary syndrome?, acute heart failure<br>Adjudication: Cardiovascular Death<br>Adjudicated cause of death: Death - Cardiovascular (Sudden Cardiac) | The narratives read <i>on Day 941 the subject experienced cardiac failure acute [acute coronary syndrome?, acute heart failure] (Grade 4) with an outcome of fatal.</i> |                                                                | <i>Death - Cardiovascular (Due To Heart Failure)</i> |
| #663 | 24476 | PLA | Reported term: Death<br>Coded term: Death<br>Adjudication: Cardiovascular Death<br>Adjudicated cause of death: Death - Undetermined                                                                            | The narratives read <i>on Day 931 the subject experienced cardiac failure [heart failure] (Grade 4) with an outcome of fatal.</i>                                       |                                                                | <i>Death - Cardiovascular (Due To Heart Failure)</i> |
| #666 | 24479 | EVO | Reported term: Sudden death<br>Coded term: Sudden death<br>Adjudication: Cardiovascular Death<br>Adjudicated cause of death: Death - Cardiovascular (Sudden Cardiac)                                           | The narrative contained no evidence to support the FOURIER Clinical Events Committee's adjudicated cause of death.                                                      | <i>Death Undetermined</i><br>Additional information requested. | <i>Death Undetermined</i>                            |
| #667 | 24480 | PLA | Reported term: Death<br>Coded term: Death<br>Adjudication: Undetermined Death<br>Adjudicated cause of death: Death - Cardiovascular (Sudden Cardiac)                                                           | The narrative contained no evidence to support the FOURIER Clinical Events Committee's adjudicated cause of death.                                                      | <i>Death Undetermined</i><br>Additional information requested. | <i>Death Undetermined</i>                            |
| #669 | 24482 | EVO | Reported term: Death<br>Coded term: Death<br>Adjudication: Cardiovascular Death<br>Adjudicated cause of death: Death - Cardiovascular (Due To Stroke)                                                          | The narrative contained no evidence to support the FOURIER Clinical Events Committee's adjudicated cause of death.                                                      | <i>Death Undetermined</i><br>Additional information requested. | <i>Death Undetermined</i>                            |
| #670 | 24483 | PLA | Reported term: Death<br>Coded term: Death<br>Adjudication: Non-Cardiovascular Death<br>Adjudicated cause of death: Death - Cardiovascular (Due To Stroke)                                                      | The narrative contained no evidence to support the FOURIER Clinical Events Committee's adjudicated cause of death.                                                      | <i>Death Undetermined</i><br>Additional information requested. | <i>Death Undetermined</i>                            |

|      |       |     |                                                                                                                                                                                                |                                                                                                                                                       |                                                                    |                                                      |
|------|-------|-----|------------------------------------------------------------------------------------------------------------------------------------------------------------------------------------------------|-------------------------------------------------------------------------------------------------------------------------------------------------------|--------------------------------------------------------------------|------------------------------------------------------|
| #671 | 24484 | EVO | Reported term: Cardiac failure acute<br>Coded term: Acute coronary insufficiency<br>Adjudication: Cardiovascular Death<br>Adjudicated cause of death: Death - Cardiovascular (Sudden Cardiac)  | The narratives read <i>on Day 80 the subject experienced cardiac failure acute [acute coronary insufficiency] (Grade 4) with an outcome of fatal.</i> |                                                                    | <i>Death - Cardiovascular (Due To Heart Failure)</i> |
| #672 | 24485 | PLA | Reported term: Death<br>Coded term: Death<br>Adjudication: Cardiovascular Death<br>Adjudicated cause of death: Death - Cardiovascular (Due To An Acute MI)                                     | The narrative contained no evidence to support the FOURIER Clinical Events Committee's adjudicated cause of death.                                    | <i>Death Undetermined</i><br><br>Additional information requested. | <i>Death Undetermined</i>                            |
| #673 | 24487 | PLA | Reported term: Death<br>Coded term: Death<br>Adjudication: Cardiovascular Death<br>Adjudicated cause of death: Death - Cardiovascular (Due To Stroke)                                          | The narrative contained no evidence to support the FOURIER Clinical Events Committee's adjudicated cause of death.                                    | <i>Death Undetermined</i><br><br>Additional information requested. | <i>Death Undetermined</i>                            |
| #674 | 24488 | PLA | Reported term: Death<br>Coded term: Death<br>Adjudication: Undetermined Death<br>Adjudicated cause of death: Death - Non-Cardiovascular (Malignancy)                                           | The narrative contained no evidence to support the FOURIER Clinical Events Committee's adjudicated cause of death.                                    | <i>Death Undetermined</i><br><br>Additional information requested. | <i>Death Undetermined</i>                            |
| #676 | 24490 | PLA | Reported term: Death<br>Coded term: Unknown cause of death<br>Adjudication: Undetermined Death<br>Adjudicated cause of death: Death - Cardiovascular (Sudden Cardiac)                          | The narratives read <i>on Day 251 the subject experienced death [unknown cause of death] (Grade 4).</i>                                               |                                                                    | <i>Death Undetermined</i>                            |
| #679 | 24493 | EVO | Reported term: Myocardial ischaemia<br>Coded term: Chronic ischemic heart disease<br>Adjudication: Cardiovascular Death<br>Adjudicated cause of death: Death - Cardiovascular (Sudden Cardiac) | The narratives read <i>on Day 662 the subject experienced myocardial ischaemia [chronic ischemic heart</i>                                            |                                                                    | <i>Death - Cardiovascular (Due To An Acute MI)</i>   |

|      |       |     |                                                                                                                                                                                           |                                                                                                                    |                                                                    |                                                                |
|------|-------|-----|-------------------------------------------------------------------------------------------------------------------------------------------------------------------------------------------|--------------------------------------------------------------------------------------------------------------------|--------------------------------------------------------------------|----------------------------------------------------------------|
|      |       |     |                                                                                                                                                                                           | <i>disease] with an outcome of fatal.</i>                                                                          |                                                                    |                                                                |
| #680 | 24494 | PLA | Reported term: Death<br>Coded term: Death<br>Adjudication: Cardiovascular Death<br>Adjudicated cause of death: Death - Cardiovascular (Sudden Cardiac)                                    | The narrative contained no evidence to support the FOURIER Clinical Events Committee's adjudicated cause of death. | <i>Death Undetermined</i><br><br>Additional information requested. | <i>Death Undetermined</i>                                      |
| #681 | 24495 | EVO | Reported term: Death<br>Coded term: Death<br>Adjudication: Cardiovascular Death<br>Adjudicated cause of death: Death - Cardiovascular (Sudden Cardiac)                                    | The narrative contained no evidence to support the FOURIER Clinical Events Committee's adjudicated cause of death. | <i>Death Undetermined</i><br><br>Additional information requested. | <i>Death Undetermined</i>                                      |
| #682 | 24496 | PLA | Reported term: Death<br>Coded term: Death<br>Adjudication: Cardiovascular Death<br>Adjudicated cause of death: Death - Cardiovascular (Sudden Cardiac)                                    | The narrative contained no evidence to support the FOURIER Clinical Events Committee's adjudicated cause of death. | <i>Death Undetermined</i><br><br>Additional information requested. | <i>Death Undetermined</i>                                      |
| #683 | 24497 | PLA | Reported term: Cardiac failure<br>Coded term: Heart failure, unspecified<br>Adjudication: Cardiovascular Death<br>Adjudicated cause of death: Death - Cardiovascular (Due To An Acute MI) | The narratives read <i>on Day 56 the subject experienced pneumonia</i> and died on Day 57.                         |                                                                    | <i>Death - Non-Cardiovascular (Infection; Includes Sepsis)</i> |
| #688 | 24502 | PLA | Reported term: Death<br>Coded term: Death<br>Adjudication: Cardiovascular Death<br>Adjudicated cause of death: Death - Cardiovascular (Due To Stroke)                                     | The narrative contained no evidence to support the FOURIER Clinical Events Committee's adjudicated cause of death. | <i>Death Undetermined</i><br><br>Additional information requested. | <i>Death Undetermined</i>                                      |
| #693 | 24507 | PLA | Reported term: Myocardial infarction<br>Coded term: Myocardial infarction                                                                                                                 | The narratives read <i>on Day 850 the subject experienced</i>                                                      |                                                                    | <i>Death - Cardiovascular (Due To An Acute MI)</i>             |

|      |       |     |                                                                                                                                                                                                     |                                                                                                                                                          |                                                                                                       |                                                                   |
|------|-------|-----|-----------------------------------------------------------------------------------------------------------------------------------------------------------------------------------------------------|----------------------------------------------------------------------------------------------------------------------------------------------------------|-------------------------------------------------------------------------------------------------------|-------------------------------------------------------------------|
|      |       |     | Adjudication: Cardiovascular Death<br>Adjudicated cause of death: Death - Cardiovascular (Sudden Cardiac)                                                                                           | <i>myocardial infarction (Grade 4) with an outcome of fatal.</i>                                                                                         |                                                                                                       |                                                                   |
| #696 | 24510 | EVO | Reported term: Death<br>Coded term: Death<br>Adjudication: Cardiovascular Death<br>Adjudicated cause of death: Death - Cardiovascular (Sudden Cardiac)                                              | The narratives read on Day 186 the subject experienced <i>pulmonary hypertension (grade 3)</i> and died on Day 201.                                      | <i>Death Undetermined</i> (suspect pulmonary cause of death)<br><br>Additional information requested. | <i>Death Undetermined</i>                                         |
| #700 | 24514 | PLA | Reported term: Myocardial ischaemia<br>Coded term: Ischemic heart disease<br>Adjudication: Cardiovascular Death<br>Adjudicated cause of death: Death - Cardiovascular (Sudden Cardiac)              | The narratives read on Day 306 the subject experienced <i>myocardial ischaemia [ischemic heart disease] (Grade 4) with an outcome of fatal.</i>          |                                                                                                       | <i>Death - Cardiovascular (Due To An Acute MI)</i>                |
| #701 | 24515 | EVO | Reported term: Myocardial infarction<br>Coded term: Myocardial infarction<br>Adjudication: Cardiovascular Death<br>Adjudicated cause of death: Death - Cardiovascular (Sudden Cardiac)              | The narratives read on Day 928 the subject experienced <i>myocardial infarction (Grade 4) with an outcome of fatal.</i>                                  |                                                                                                       | <i>Death - Cardiovascular (Due To An Acute MI)</i>                |
| #704 | 24518 | EVO | Reported term: Gastrointestinal haemorrhage<br>Coded term: Gastro intestinal bleed<br>Adjudication: Non-Cardiovascular Death<br>Adjudicated cause of death: Death - Cardiovascular (Sudden Cardiac) | The narratives read on Day 537 the subject experienced <i>gastrointestinal haemorrhage [gastro intestinal bleed] (Grade 4) with an outcome of fatal.</i> |                                                                                                       | <i>Death - Non-Cardiovascular (Non-Cardiovascular Hemorrhage)</i> |
| #706 | 24520 | EVO | Reported term: Pneumonia<br>Coded term: Pneumonia                                                                                                                                                   | The narratives read on Day 411 the subject experienced <i>pneumonia (Grade 4) with an outcome of fatal.</i>                                              |                                                                                                       | <i>Death - Non-Cardiovascular (Infection; Includes Sepsis)</i>    |

|      |       |     |                                                                                                                                                                                     |                                                                                                                                          |                                                                    |                                                                                       |
|------|-------|-----|-------------------------------------------------------------------------------------------------------------------------------------------------------------------------------------|------------------------------------------------------------------------------------------------------------------------------------------|--------------------------------------------------------------------|---------------------------------------------------------------------------------------|
|      |       |     | Adjudication: Non-Cardiovascular Death<br>Adjudicated cause of death: Death - Non-Cardiovascular (Pulmonary)                                                                        |                                                                                                                                          |                                                                    |                                                                                       |
| #707 | 24521 | PLA | Reported term: Death<br>Coded term: Death<br>Adjudication: Cardiovascular Death<br>Adjudicated cause of death: Death - Cardiovascular (Sudden Cardiac)                              | The narratives read <i>on Day 823 the subject experienced myocardial infarction (Grade 4) with an outcome of fatal.</i> [CSR page 23378] |                                                                    | <i>Death - Cardiovascular (Due To An Acute MI)</i>                                    |
| #710 | 24525 | PLA | Reported term: Bladder cancer<br>Coded term: Bladder cancer<br>Adjudication: Cardiovascular Death<br>Adjudicated cause of death: Death - Cardiovascular (Sudden Cardiac)            | The narratives read <i>on Day 173 the subject experienced bladder cancer (Grade 4) with an outcome of fatal.</i>                         |                                                                    | <i>Death - Non-Cardiovascular (Malignancy)</i>                                        |
| #716 | 24531 | EVO | Reported term: Sudden death<br>Coded term: Sudden death of unknown cause<br>Adjudication: Undetermined Death<br>Adjudicated cause of death: Death - Cardiovascular (Sudden Cardiac) | The narratives read <i>on Day 335 the subject experienced sudden death [sudden death of unknown cause] (Grade 4).</i>                    |                                                                    | <i>Death Undetermined</i>                                                             |
| #717 | 24532 | PLA | Reported term: Pulmonary embolism<br>Coded term: Pulmonary embolism<br>Adjudication: Cardiovascular Death<br>Adjudicated cause of death: Death - Cardiovascular (Sudden Cardiac)    | The narratives read <i>on Day 676 the subject experienced pulmonary embolism (Grade 4) with an outcome of fatal.</i>                     |                                                                    | <i>Death - Cardiovascular (Due To Other Cardiovascular Causes) (Pulmonary Emboli)</i> |
| #718 | 24533 | EVO | Reported term: Cardiac arrest<br>Coded term: Cardiac arrest<br>Adjudication: Cardiovascular Death<br>Adjudicated cause of death: Death - Cardiovascular (Due To An Acute MI)        | The narrative contained no evidence to support the FOURIER Clinical Events Committee's adjudicated cause of death.                       | <i>Death Undetermined</i><br><br>Additional information requested. | <i>Death Undetermined</i>                                                             |
| #722 | 24537 | PLA | Reported term: Death<br>Coded term: Death                                                                                                                                           | The narrative contained no evidence to support the                                                                                       | <i>Death Undetermined</i>                                          | <i>Death Undetermined</i>                                                             |

|      |       |     |                                                                                                                                                                                         |                                                                                                                                              |                                                                    |                                                                |
|------|-------|-----|-----------------------------------------------------------------------------------------------------------------------------------------------------------------------------------------|----------------------------------------------------------------------------------------------------------------------------------------------|--------------------------------------------------------------------|----------------------------------------------------------------|
|      |       |     | Adjudication: Undetermined Death<br>Adjudicated cause of death: Death - Cardiovascular (Sudden Cardiac)                                                                                 | FOURIER Clinical Events Committee's adjudicated cause of death.                                                                              | Additional information requested.                                  |                                                                |
| #727 | 24542 | PLA | Reported term: Death<br>Coded term: Death from natural causes<br>Adjudication: Cardiovascular Death<br>Adjudicated cause of death: Death - Cardiovascular (Sudden Cardiac)              | The narratives read <i>on Day 12 the subject experienced death [death from natural causes] (Grade 4).</i>                                    |                                                                    | <i>Death Undetermined</i>                                      |
| #730 | 24545 | EVO | Reported term: Pneumonia aspiration<br>Coded term: Aspiration pneumonia<br>Adjudication: Non-Cardiovascular Death<br>Adjudicated cause of death: Death - Non-Cardiovascular (Pulmonary) | The narratives read <i>on Day 45 the subject experienced pneumonia aspiration [aspiration pneumonia] (Grade 4) with an outcome of fatal.</i> |                                                                    | <i>Death - Non-Cardiovascular (Infection; Includes Sepsis)</i> |
| #731 | 24547 | EVO | Reported term: Bronchitis<br>Coded term: Bronchial infection<br>Adjudication: Non-Cardiovascular Death<br>Adjudicated cause of death: Death - Non-Cardiovascular (Pulmonary)            | The narratives read <i>on Day 197 the subject experienced bronchitis [bronchial infection] (Grade 4) with an outcome of fatal.</i>           |                                                                    | <i>Death - Non-Cardiovascular (Infection; Includes Sepsis)</i> |
| #738 | 24555 | PLA | Reported term: Death<br>Coded term: Death<br>Adjudication: Undetermined Death<br>Adjudicated cause of death: Death - Cardiovascular (Sudden Cardiac)                                    | The narrative contained no evidence to support the FOURIER Clinical Events Committee's adjudicated cause of death.                           | <i>Death Undetermined</i><br><br>Additional information requested. | <i>Death Undetermined</i>                                      |
| #742 | 24560 | EVO | Reported term: Sudden death<br>Coded term: Sudden death<br>Adjudication: Cardiovascular Death<br>Adjudicated cause of death: Death - Cardiovascular (Sudden Cardiac)                    | The narrative contained no evidence to support the FOURIER Clinical Events Committee's adjudicated cause of death.                           | <i>Death Undetermined</i><br><br>Additional information requested. | <i>Death Undetermined</i>                                      |

|      |       |     |                                                                                                                                                                                                            |                                                                                                                                                                                                      |                                                                    |                                                                              |
|------|-------|-----|------------------------------------------------------------------------------------------------------------------------------------------------------------------------------------------------------------|------------------------------------------------------------------------------------------------------------------------------------------------------------------------------------------------------|--------------------------------------------------------------------|------------------------------------------------------------------------------|
| #744 | 24562 | PLA | Reported term: Subdural haematoma<br>Coded term: Subdural haematoma<br>Adjudication: Cardiovascular Death<br>Adjudicated cause of death: Death - Non-Cardiovascular (Trauma)                               | The narratives read <i>on Day 500 the subject experienced cerebral infarction [subacute right frontal lobe periventricular white matter infarct] (Grade 4) [CSR page 18997]</i> and died on Day 507. | <i>Death Undetermined</i><br><br>Additional information requested. | <i>Death Undetermined</i>                                                    |
| #746 | 24564 | EVO | Reported term: Death<br>Coded term: Death<br>Adjudication: Cardiovascular Death<br>Adjudicated cause of death: Death - Cardiovascular (Due To Stroke)                                                      | The narrative contained no evidence to support the FOURIER Clinical Events Committee's adjudicated cause of death.                                                                                   | <i>Death Undetermined</i><br><br>Additional information requested. | <i>Death Undetermined</i>                                                    |
| #749 | 24568 | PLA | Reported term: Death<br>Coded term: Death<br>Adjudication: Cardiovascular Death<br>Adjudicated cause of death: Death - Cardiovascular (Due To Stroke)                                                      | The narrative contained no evidence to support the FOURIER Clinical Events Committee's adjudicated cause of death.                                                                                   | <i>Death Undetermined</i><br><br>Additional information requested. | <i>Death Undetermined</i>                                                    |
| #754 | 24573 | EVO | Reported term: Cerebral haemorrhage<br>Coded term: Cerebral haemorrhage<br>Adjudication: Non-Cardiovascular Death<br>Adjudicated cause of death: Death - Cardiovascular (Due To Cardiovascular Hemorrhage) | The narratives read <i>on Day 120 the subject experienced cerebral haemorrhage [cerebral hemorrhage] (Grade 4) with an outcome of fatal.</i>                                                         |                                                                    | <i>Death - Cardiovascular (Due To Stroke)</i><br><i>Cerebral haemorrhage</i> |
| #757 | 24577 | EVO | Reported term: Death<br>Coded term: Death<br>Adjudication: Undetermined Death<br>Adjudicated cause of death: Death - Cardiovascular (Due To Stroke)                                                        | The narrative contained no evidence to support the FOURIER Clinical Events Committee's adjudicated cause of death.                                                                                   | <i>Death Undetermined</i><br><br>Additional information requested. | <i>Death Undetermined</i>                                                    |



|      |       |     |                                                                                                                                                                                        |                                                                                                                                                      |  |                                                         |
|------|-------|-----|----------------------------------------------------------------------------------------------------------------------------------------------------------------------------------------|------------------------------------------------------------------------------------------------------------------------------------------------------|--|---------------------------------------------------------|
| #759 | 24579 | EVO | Reported term: Death<br>Coded term: Death<br>Adjudication: Cardiovascular Death<br>Adjudicated cause of death: Death - Cardiovascular (Sudden Cardiac)                                 | The narratives read on Day 443 the subject experienced acute kidney injury [acute renal failure] (Grade 3) [CSR page 19612] and died on Day 446.     |  | Death - Non-Cardiovascular (Renal)                      |
| #760 | 24581 | PLA | Reported term: Myocardial infarction<br>Coded term: Myocardial infarction<br>Adjudication: Cardiovascular Death<br>Adjudicated cause of death: Death - Cardiovascular (Sudden Cardiac) | The narratives read on Day 326 the subject experienced myocardial infarction with an outcome of fatal.                                               |  | Death - Cardiovascular (Due To An Acute MI)             |
| #761 | 24582 | EVO | Reported term: Death<br>Coded term: Death<br>Adjudication: Cardiovascular Death<br>Adjudicated cause of death: Death - Non-Cardiovascular (Infection; Includes Sepsis)                 | The narratives read on Day 966 the subject experienced lung neoplasm malignant [worsening of lung cancer] (Grade 3) and on Day 969 the subject died. |  | Death - Non-Cardiovascular (Malignancy)                 |
| #764 | 24586 | PLA | Reported term: Sepsis<br>Coded term: Septicemia<br>Adjudication: Non-Cardiovascular Death<br>Adjudicated cause of death: Death - Non-Cardiovascular (Malignancy)                       | The narratives read on Day 964 the subject experienced sepsis [septicemia] (Grade 4) with an outcome of fatal.                                       |  | Death - Non-Cardiovascular (Infection; Includes Sepsis) |
| #770 | 24594 | EVO | Reported term: Death<br>Coded term: Unknown death<br>Adjudication: Undetermined Death<br>Adjudicated cause of death: Death - Cardiovascular (Sudden Cardiac)                           | The narratives read on Day 370 the subject experienced death [unknown death] (Grade 4).                                                              |  | Death - Undetermined                                    |
| #771 | 24595 | EVO | Reported term: Death<br>Coded term: Death unascertained<br>Adjudication: Cardiovascular Death                                                                                          | The narratives read on Day 370 the subject experienced death [unknown death] (Grade 4).                                                              |  | Death - Undetermined                                    |

|      |       |     |                                                                                                                                                                            |                                                                                                                                                                                                            |                                                                    |                                                    |
|------|-------|-----|----------------------------------------------------------------------------------------------------------------------------------------------------------------------------|------------------------------------------------------------------------------------------------------------------------------------------------------------------------------------------------------------|--------------------------------------------------------------------|----------------------------------------------------|
|      |       |     | Adjudicated cause of death: Death - Cardiovascular (Due To An Acute MI)                                                                                                    |                                                                                                                                                                                                            |                                                                    |                                                    |
| #772 | 24596 | EVO | Reported term: Death<br>Coded term: Death<br>Adjudication: Cardiovascular Death<br>Adjudicated cause of death: Death - Non-Cardiovascular (Renal)                          | The narrative contained no evidence to support the FOURIER Clinical Events Committee's adjudicated cause of death.                                                                                         | <i>Death Undetermined</i><br><br>Additional information requested. | <i>Death Undetermined</i>                          |
| #775 | 24599 | PLA | Reported term: Death<br>Coded term: Death<br>Adjudication: Cardiovascular Death<br>Adjudicated cause of death: Death - Cardiovascular (Sudden Cardiac)                     | The narratives read on <i>Day 516 the subject experienced myocardial infarction (Grade 4) [CSR page 23592] with an outcome of fatal.</i>                                                                   |                                                                    | <i>Death - Cardiovascular (Due To An Acute MI)</i> |
| #778 | 24602 | PLA | Reported term: Death<br>Coded term: Death<br>Adjudication: Cardiovascular Death<br>Adjudicated cause of death: Death - Cardiovascular (Sudden Cardiac)                     | The narrative contained no evidence to support the FOURIER Clinical Events Committee's adjudicated cause of death.                                                                                         | <i>Death Undetermined</i><br><br>Additional information requested. | <i>Death Undetermined</i>                          |
| #779 | 24603 | PLA | Reported term: Death<br>Coded term: Unknown cause of death<br>Adjudication: Cardiovascular Death<br>Adjudicated cause of death: Death - Cardiovascular (Sudden Cardiac)    | The narratives read on <i>Day 850 the subject experienced death [unknown cause of death].</i>                                                                                                              |                                                                    | <i>Death Undetermined</i>                          |
| #782 | 24606 | EVO | Reported term: Death<br>Coded term: Death from natural causes<br>Adjudication: Cardiovascular Death<br>Adjudicated cause of death: Death - Cardiovascular (Sudden Cardiac) | The narratives read on <i>Day 65 the subject was reported with myocardial infarction [myocardial infarct] (Grade 4) and on Day 65 the subject experienced death [death from natural causes] (Grade 4).</i> |                                                                    | <i>Death - Cardiovascular (Due To An Acute MI)</i> |

|      |       |     |                                                                                                                                                                          |                                                                                                                    |                                                                    |                           |
|------|-------|-----|--------------------------------------------------------------------------------------------------------------------------------------------------------------------------|--------------------------------------------------------------------------------------------------------------------|--------------------------------------------------------------------|---------------------------|
| #784 | 24608 | EVO | Reported term: Death<br>Coded term: Death<br>Adjudication: Cardiovascular Death<br>Adjudicated cause of death: Death - Cardiovascular (Due To Heart Failure)             | The narrative contained no evidence to support the FOURIER Clinical Events Committee's adjudicated cause of death. | <i>Death Undetermined</i><br><br>Additional information requested. | <i>Death Undetermined</i> |
| #791 | 24619 | EVO | Reported term: Death<br>Coded term: Death from natural causes<br>Adjudication: Undetermined Death<br>Adjudicated cause of death: Death - Cardiovascular (Sudden Cardiac) | The narratives read <i>on Day 128 the subject experienced death [death from natural causes] (Grade 4).</i>         |                                                                    | <i>Death Undetermined</i> |
| #792 | 24620 | EVO | Reported term: Death<br>Coded term: Death<br>Adjudication: Undetermined Death<br>Adjudicated cause of death: Death - Cardiovascular (Sudden Cardiac)                     | The narrative contained no evidence to support the FOURIER Clinical Events Committee's adjudicated cause of death. | <i>Death Undetermined</i><br><br>Additional information requested. | <i>Death Undetermined</i> |
| #794 | 24622 | PLA | Reported term: Death<br>Coded term: Death<br>Adjudication: Cardiovascular Death<br>Adjudicated cause of death: Death - Cardiovascular (Due To An Acute MI)               | The narrative contained no evidence to support the FOURIER Clinical Events Committee's adjudicated cause of death. | <i>Death Undetermined</i><br><br>Additional information requested. | <i>Death Undetermined</i> |
| #795 | 24623 | EVO | Reported term: Sudden death<br>Coded term: Sudden death<br>Adjudication: Cardiovascular Death<br>Adjudicated cause of death: Death - Cardiovascular (Sudden Cardiac)     | The narrative contained no evidence to support the FOURIER Clinical Events Committee's adjudicated cause of death. | <i>Death Undetermined</i><br><br>Additional information requested. | <i>Death Undetermined</i> |
| #797 | 24625 | PLA | Reported term: Death<br>Coded term: Unknown cause of death<br>Adjudication: Undetermined Death<br>Adjudicated cause of death: Death - Cardiovascular (Sudden Cardiac)    | The narratives read <i>on Day 362 the subject experienced death [unknown cause of death].</i>                      |                                                                    | <i>Death Undetermined</i> |

|      |       |     |                                                                                                                                                                                           |                                                                                                                    |                                                                    |                           |
|------|-------|-----|-------------------------------------------------------------------------------------------------------------------------------------------------------------------------------------------|--------------------------------------------------------------------------------------------------------------------|--------------------------------------------------------------------|---------------------------|
| #798 | 24626 | PLA | Reported term: Death<br>Coded term: Death<br>Adjudication: Undetermined Death<br>Adjudicated cause of death: Death - Cardiovascular (Sudden Cardiac)                                      | The narrative contained no evidence to support the FOURIER Clinical Events Committee's adjudicated cause of death. | <i>Death Undetermined</i><br><br>Additional information requested. | <i>Death Undetermined</i> |
| #802 | 24631 | PLA | Reported term: Death<br>Coded term: Death<br>Adjudication: Undetermined Death<br>Adjudicated cause of death: Death - Cardiovascular (Due To Heart Failure)                                | The narrative contained no evidence to support the FOURIER Clinical Events Committee's adjudicated cause of death. | <i>Death Undetermined</i><br><br>Additional information requested. | <i>Death Undetermined</i> |
| #806 | 24637 | PLA | Reported term: Disease progression<br>Coded term: Disease progression NOS<br>Adjudication: Non-Cardiovascular Death<br>Adjudicated cause of death: Death - Non-Cardiovascular (Pulmonary) | The narrative contained no evidence to support the FOURIER Clinical Events Committee's adjudicated cause of death. | <i>Death Undetermined</i><br><br>Additional information requested. | <i>Death Undetermined</i> |
| #810 | 24641 | EVO | Reported term: Death<br>Coded term: Death NOS<br>Adjudication: Cardiovascular Death<br>Adjudicated cause of death: Death - Cardiovascular (Sudden Cardiac)                                | The narrative contained no evidence to support the FOURIER Clinical Events Committee's adjudicated cause of death. | <i>Death Undetermined</i><br><br>Additional information requested. | <i>Death Undetermined</i> |
| #813 | 24644 | EVO | Reported term: Death<br>Coded term: Death<br>Adjudication: Non-Cardiovascular Death<br>Adjudicated cause of death: Death - Cardiovascular (Due To Heart Failure)                          | The narrative contained no evidence to support the FOURIER Clinical Events Committee's adjudicated cause of death. | <i>Death Undetermined</i><br><br>Additional information requested. | <i>Death Undetermined</i> |
| #816 | 24647 | EVO | Reported term: Death<br>Coded term: Death<br>Adjudication: Undetermined Death                                                                                                             | The narrative contained no evidence to support the FOURIER Clinical Events                                         | <i>Death Undetermined</i><br><br>Additional information requested. | <i>Death Undetermined</i> |

|      |       |     |                                                                                                                                                                                        |                                                                                                                    |                                                                |                                                    |
|------|-------|-----|----------------------------------------------------------------------------------------------------------------------------------------------------------------------------------------|--------------------------------------------------------------------------------------------------------------------|----------------------------------------------------------------|----------------------------------------------------|
|      |       |     | Adjudicated cause of death: Death - Cardiovascular (Due To Stroke)                                                                                                                     | Committee's adjudicated cause of death.                                                                            |                                                                |                                                    |
| #818 | 24649 | PLA | Reported term: Death<br>Coded term: Death<br>Adjudication: Undetermined Death<br>Adjudicated cause of death: Death - Cardiovascular (Sudden Cardiac)                                   | The narrative contained no evidence to support the FOURIER Clinical Events Committee's adjudicated cause of death. | <i>Death Undetermined</i><br>Additional information requested. | <i>Death Undetermined</i>                          |
| #820 | 24651 | PLA | Reported term: Death<br>Coded term: Death<br>Adjudication: Undetermined Death<br>Adjudicated cause of death: Death - Cardiovascular (Sudden Cardiac)                                   | The narrative contained no evidence to support the FOURIER Clinical Events Committee's adjudicated cause of death. | <i>Death Undetermined</i><br>Additional information requested. | <i>Death Undetermined</i>                          |
| #822 | 24654 | PLA | Reported term: Death<br>Coded term: Death<br>Adjudication: Undetermined Death<br>Adjudicated cause of death: Death - Cardiovascular (Sudden Cardiac)                                   | The narrative contained no evidence to support the FOURIER Clinical Events Committee's adjudicated cause of death. | <i>Death Undetermined</i><br>Additional information requested. | <i>Death Undetermined</i>                          |
| #823 | 24655 | EVO | Reported term: Death<br>Coded term: Death<br>Adjudication: Undetermined Death<br>Adjudicated cause of death: Death - Cardiovascular (Sudden Cardiac)                                   | The narrative contained no evidence to support the FOURIER Clinical Events Committee's adjudicated cause of death. | <i>Death Undetermined</i><br>Additional information requested. | <i>Death Undetermined</i>                          |
| #824 | 24656 | EVO | Reported term: Myocardial infarction<br>Coded term: Myocardial infarction<br>Adjudication: Cardiovascular Death<br>Adjudicated cause of death: Death - Cardiovascular (Sudden Cardiac) | The narratives read on Day 336 the subject experienced myocardial infarction (Grade 4) with an outcome of fatal.   |                                                                | <i>Death - Cardiovascular (Due To An Acute MI)</i> |
| #825 | 24657 | PLA | Reported term: Death<br>Coded term: Death<br>Adjudication: Undetermined Death                                                                                                          | The narrative contained no evidence to support the FOURIER Clinical Events                                         | <i>Death Undetermined</i><br>Additional information requested. | <i>Death Undetermined</i>                          |

|      |       |     |                                                                                                                                                                               |                                                                                                                    |                                                                |                                                                |
|------|-------|-----|-------------------------------------------------------------------------------------------------------------------------------------------------------------------------------|--------------------------------------------------------------------------------------------------------------------|----------------------------------------------------------------|----------------------------------------------------------------|
|      |       |     | Adjudicated cause of death: Death - Cardiovascular (Due To Stroke)                                                                                                            | Committee's adjudicated cause of death.                                                                            |                                                                |                                                                |
| #832 | 24664 | PLA | Reported term: Death<br>Coded term: Death<br>Adjudication: Undetermined Death<br>Adjudicated cause of death: Death - Cardiovascular (Sudden Cardiac)                          | The narrative contained no evidence to support the FOURIER Clinical Events Committee's adjudicated cause of death. | <i>Death Undetermined</i><br>Additional information requested. | <i>Death Undetermined</i>                                      |
| #835 | 24667 | EVO | Reported term: Death<br>Coded term: Unknown cause of death<br>Adjudication: Undetermined Death<br>Adjudicated cause of death: Death - Cardiovascular (Sudden Cardiac)         | The narratives read <i>on Day 461 the subject experienced death [unknown cause of death]</i> .                     |                                                                | <i>Death Undetermined</i>                                      |
| #836 | 24668 | PLA | Reported term: Death<br>Coded term: Death<br>Adjudication: Undetermined Death<br>Adjudicated cause of death: Death - Cardiovascular (Due To Heart Failure)                    | The narrative contained no evidence to support the FOURIER Clinical Events Committee's adjudicated cause of death. | <i>Death Undetermined</i><br>Additional information requested. | <i>Death Undetermined</i>                                      |
| #837 | 24669 | PLA | Reported term: Death<br>Coded term: Death<br>Adjudication: Undetermined Death<br>Adjudicated cause of death: Death - Non-Cardiovascular (Trauma)                              | The narrative contained no evidence to support the FOURIER Clinical Events Committee's adjudicated cause of death. | <i>Death Undetermined</i><br>Additional information requested. | <i>Death Undetermined</i>                                      |
| #840 | 24672 | PLA | Reported term: Unevaluable event<br>Coded term: Unevaluable event<br>Adjudication: Cardiovascular Death<br>Adjudicated cause of death: Death - Cardiovascular (Due To Stroke) | The narratives read <i>on Day 127 the subject experienced unevaluable event (Grade 4)</i> .                        |                                                                | <i>Death Undetermined</i>                                      |
| #841 | 24673 | EVO | Reported term: Toxicity to various agents<br>Coded term: Drug toxicity - fentanyl & cocaine                                                                                   | The narratives read on Day 670 the subject experienced toxicity to various agents                                  |                                                                | <i>Death - Non-Cardiovascular (Poisoning; opioid overdose)</i> |

|      |       |     |                                                                                                                                                                                            |                                                                                                                         |                                                                    |                                               |
|------|-------|-----|--------------------------------------------------------------------------------------------------------------------------------------------------------------------------------------------|-------------------------------------------------------------------------------------------------------------------------|--------------------------------------------------------------------|-----------------------------------------------|
|      |       |     | Adjudication: Non-Cardiovascular Death<br>Adjudicated cause of death: Death - Undetermined                                                                                                 | [drug toxicity – fentanyl & cocaine] (Grade 4) with an outcome of fatal.                                                |                                                                    |                                               |
| #842 | 24674 | EVO | Reported term: Death<br>Coded term: Death<br>Adjudication: Undetermined Death<br>Adjudicated cause of death: Death - Cardiovascular (Sudden Cardiac)                                       | The narrative contained no evidence to support the FOURIER Clinical Events Committee’s adjudicated cause of death.      | <i>Death Undetermined</i><br><br>Additional information requested. | <i>Death Undetermined</i>                     |
| #843 | 24675 | PLA | Reported term: Death<br>Coded term: Death<br>Adjudication: Non-Cardiovascular Death<br>Adjudicated cause of death: Death - Non-Cardiovascular (Malignancy)                                 | The narrative contained no evidence to support the FOURIER Clinical Events Committee’s adjudicated cause of death.      | <i>Death Undetermined</i><br><br>Additional information requested. | <i>Death Undetermined</i>                     |
| #845 | 24677 | PLA | Reported term: Respiratory arrest<br>Coded term: Respiratory arrest<br>Adjudication: Non-Cardiovascular Death<br>Adjudicated cause of death: Death - Cardiovascular (Due To Heart Failure) | The narratives read <i>on Day 401 the subject experienced respiratory failure</i> and died on Day 412 [CSR page 21582]. |                                                                    | <i>Death - Non-Cardiovascular (Pulmonary)</i> |
| #849 | 24682 | EVO | Reported term: Death<br>Coded term: Death<br>Adjudication: Cardiovascular Death<br>Adjudicated cause of death: Death - Cardiovascular (Sudden Cardiac)                                     | The narrative contained no evidence to support the FOURIER Clinical Events Committee’s adjudicated cause of death.      | <i>Death Undetermined</i><br><br>Additional information requested. | <i>Death Undetermined</i>                     |
| #852 | 24685 | PLA | Reported term: Death<br>Coded term: Death<br>Adjudication: Undetermined Death<br>Adjudicated cause of death: Death - Cardiovascular (Sudden Cardiac)                                       | The narrative contained no evidence to support the FOURIER Clinical Events Committee’s adjudicated cause of death.      | <i>Death Undetermined</i><br><br>Additional information requested. | <i>Death Undetermined</i>                     |
| #854 | 24687 | PLA | Reported term: Death<br>Coded term: Death<br>Adjudication: Non-Cardiovascular Death                                                                                                        | The narrative contained no evidence to support the FOURIER Clinical Events                                              | <i>Death Undetermined</i>                                          | <i>Death Undetermined</i>                     |

|      |       |     |                                                                                                                                                                                            |                                                                                                                                                                                               |                                                                    |                                                      |
|------|-------|-----|--------------------------------------------------------------------------------------------------------------------------------------------------------------------------------------------|-----------------------------------------------------------------------------------------------------------------------------------------------------------------------------------------------|--------------------------------------------------------------------|------------------------------------------------------|
|      |       |     | Adjudicated cause of death: Death - Cardiovascular (Due To Stroke)                                                                                                                         | Committee's adjudicated cause of death.                                                                                                                                                       | Additional information requested.                                  |                                                      |
| #855 | 24688 | PLA | Reported term: Cerebrovascular accident<br>Coded term: Death due to stroke<br>Adjudication: Non-Cardiovascular Death<br>Adjudicated cause of death: Death - Non-Cardiovascular (Renal)     | The narratives read <i>on Day 561 the subject experienced cerebrovascular accident [death due to stroke] (Grade 4).</i>                                                                       |                                                                    | <i>Death - Cardiovascular (Due To Stroke)</i>        |
| #858 | 24692 | PLA | Reported term: Death<br>Coded term: Death<br>Adjudication: Cardiovascular Death<br>Adjudicated cause of death: Death - Cardiovascular (Sudden Cardiac)                                     | The narrative contained no evidence to support the FOURIER Clinical Events Committee's adjudicated cause of death.                                                                            | <i>Death Undetermined</i><br><br>Additional information requested. | <i>Death Undetermined</i>                            |
| #859 | 24693 | PLA | Reported term: Death<br>Coded term: Death<br>Adjudication: Non-Cardiovascular Death<br>Adjudicated cause of death: Death - Non-Cardiovascular (Infection; Includes Sepsis)                 | The narratives read on Day 515 the subject experienced cardiac failure chronic [heart failure nyha class iv] (Grade 4). The event ended on day 522 with an outcome of fatal [CSR page 23758]. |                                                                    | <i>Death - Cardiovascular (Due To Heart Failure)</i> |
| #860 | 24694 | EVO | Reported term: Sudden death<br>Coded term: Sudden death<br>Adjudication: Cardiovascular Death<br>Adjudicated cause of death: Death - Cardiovascular (Sudden Cardiac)                       | The narrative contained no evidence to support the FOURIER Clinical Events Committee's adjudicated cause of death.                                                                            | <i>Death Undetermined</i><br><br>Additional information requested. | <i>Death Undetermined</i>                            |
| #861 | 24695 | EVO | Reported term: Cardio-respiratory arrest<br>Coded term: Cardiorespiratory arrest<br>Adjudication: Undetermined Death<br>Adjudicated cause of death: Death - Non-Cardiovascular (Pulmonary) | The narrative contained no evidence to support the FOURIER Clinical Events Committee's adjudicated cause of death.                                                                            | <i>Death Undetermined</i><br><br>Additional information requested. | <i>Death Undetermined</i>                            |



|      |       |     |                                                                                                                                                                                                   |                                                                                                                                                   |  |                                                      |
|------|-------|-----|---------------------------------------------------------------------------------------------------------------------------------------------------------------------------------------------------|---------------------------------------------------------------------------------------------------------------------------------------------------|--|------------------------------------------------------|
| #869 | 24703 | PLA | <p>Reported term: Cerebral haemorrhage<br/> Coded term: Intracerebral hemorrhage<br/> Adjudication: Cardiovascular Death<br/> Adjudicated cause of death: Death - Non-Cardiovascular (Trauma)</p> | <p>The narratives read on Day 127 the subject experienced cerebral haemorrhage [intracerebral hemorrhage] (Grade 4) with an outcome of fatal.</p> |  | <p><i>Death - Cardiovascular (Due To Stroke)</i></p> |
|------|-------|-----|---------------------------------------------------------------------------------------------------------------------------------------------------------------------------------------------------|---------------------------------------------------------------------------------------------------------------------------------------------------|--|------------------------------------------------------|
